# Supplementary material for: Programmable C:G to G:C genome editing with CRISPR-Cas9-directed base excision repair proteins
Source: PubMed Central journal article supplement (PMC7925527; doi:10.1038/s41467-021-21559-9), 2021-03-02
Supplement: 41467_2021_21559_MOESM1_ESM.pdf [file 41467_2021_21559_MOESM1_ESM.pdf]

## Supplementary Information

Programmable C:G to G:C genome editing with CRISPR-Cas9-directed base excision repair proteins

Liwei Chen<sup>1</sup>, Jung Eun Park<sup>1</sup>, Peter Paa<sup>1</sup>, Priscilla D. Rajakumar<sup>1</sup>, Hong-Ting Prekop<sup>1</sup>, Yi Ting Chew<sup>1</sup>, Swathi N. Manivannan<sup>1</sup>, Wei Leong Chew<sup>1, \*</sup>

<sup>1</sup> Genome Institute of Singapore, Agency for Science, Technology and Research, Singapore 138672, Singapore.

\*Correspondence to: [chewwl@gis.a-star.edu.sg](mailto:chewwl@gis.a-star.edu.sg)

Supplementary figures, tables and legends:

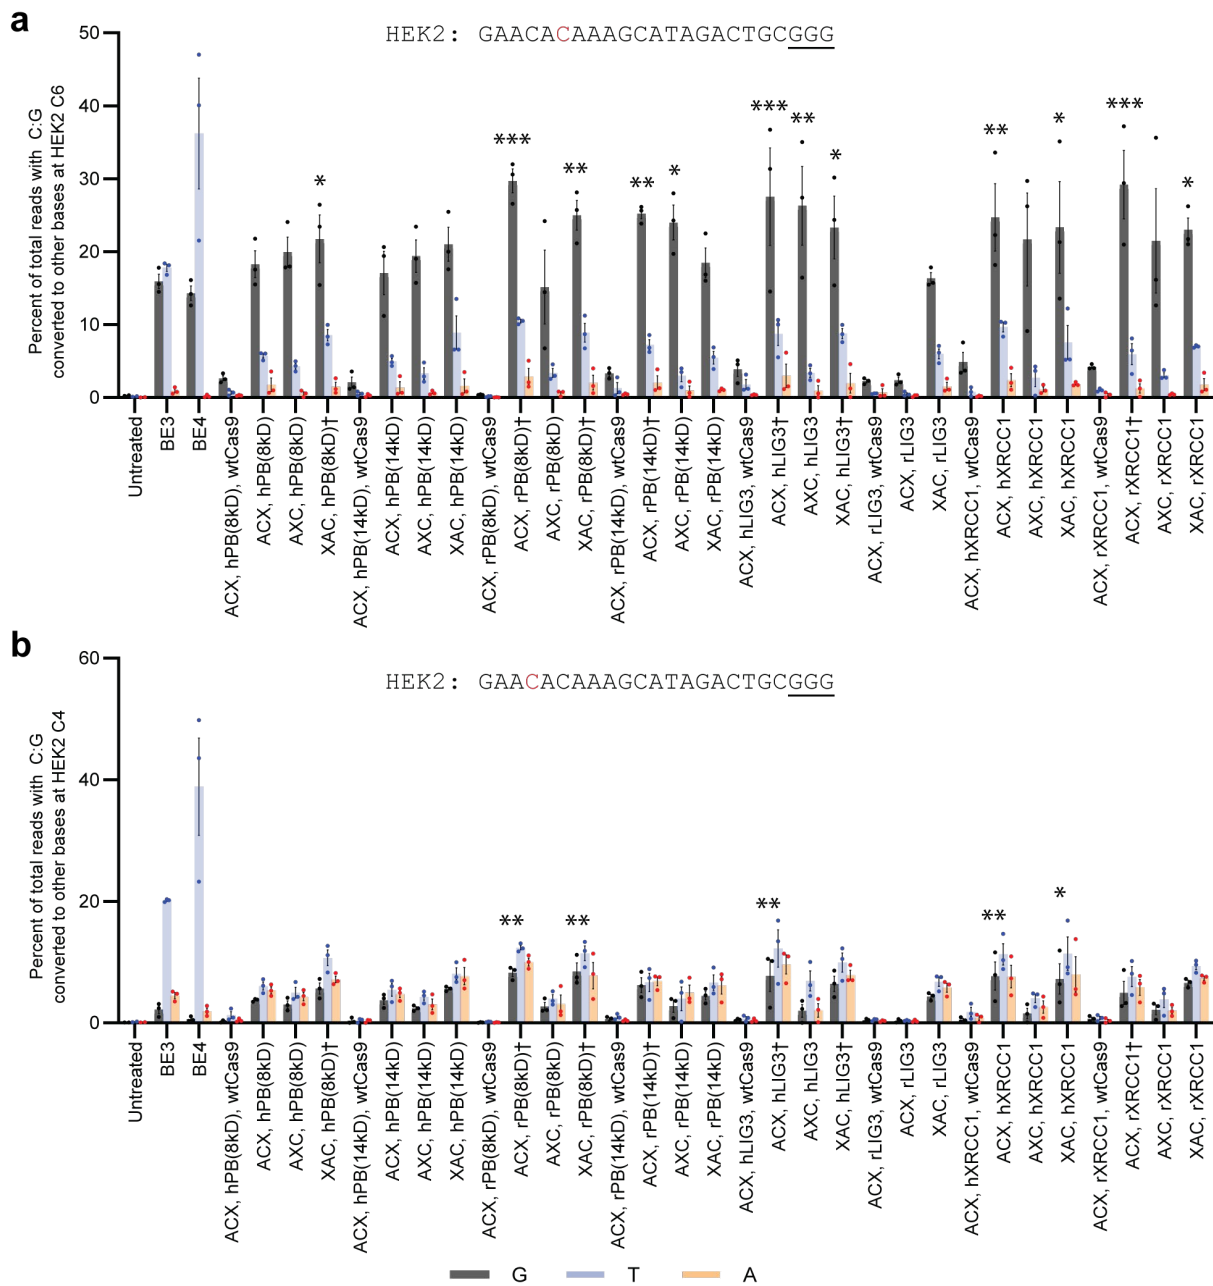

**Supplementary Figure 1. Initial screen of CGBE candidates on HEK2.** (a) For some CGBE candidates, C:G to G:C editing is the predominant edit at position 6. (b) C:G to T:A editing is the predominant edit at position 4. The seven candidates selected for further studies are marked with †. Targeted C's are in red. PAMs are underlined. \* $p < 0.05$ ; \*\* $p < 0.01$ ; \*\*\* $p < 0.001$  using one-way ANOVA (Dunn-Šidák) of C:G to G:C editing against 'Untreated.' Exact p values are available in Source Data. Each dot represents editing of an individual biological replicate; bars represent mean values; error bars represent SEM of three biologically independent replicates.

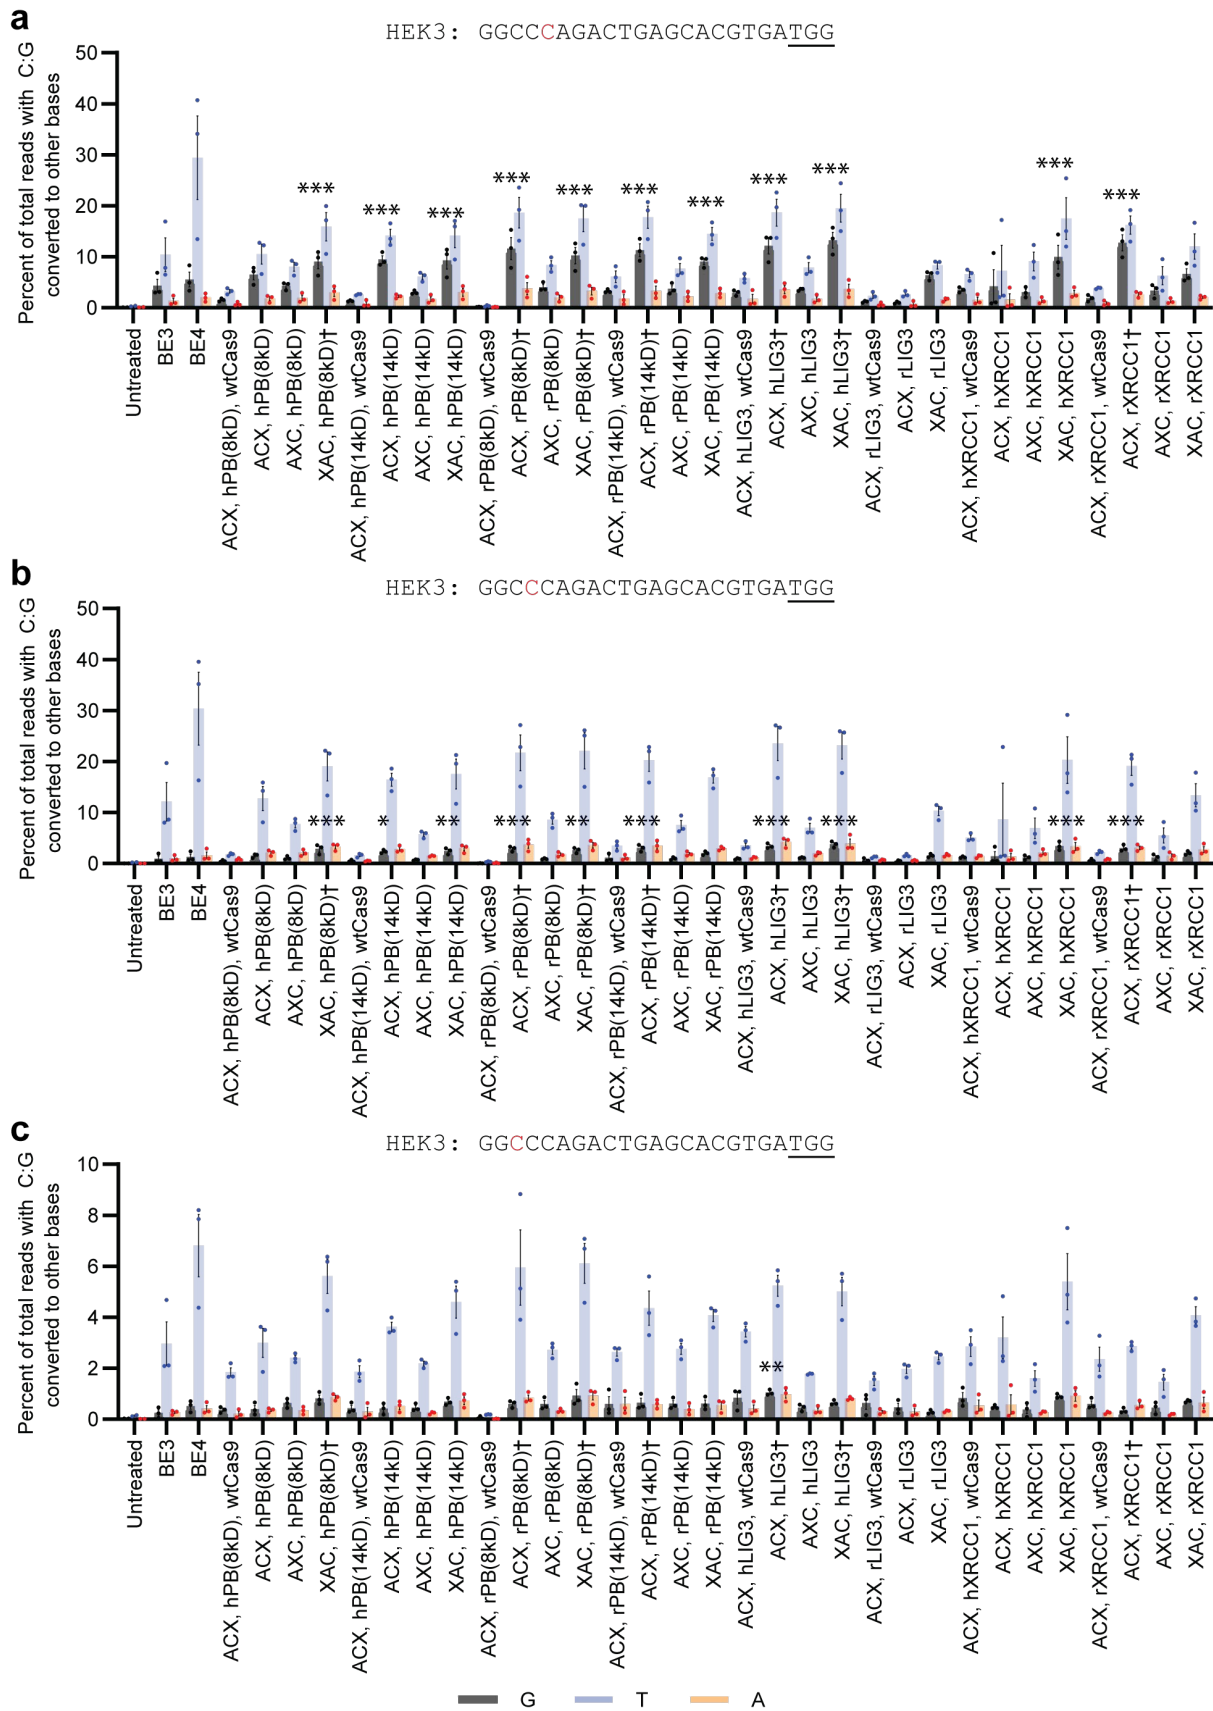

**Supplementary Figure 2. Initial screen of CGBE candidates on *HEK3* at (a) position 5, (b) position 4, and (c) position 3. The seven candidates selected for further studies are marked with †. Targeted C is in red. PAM is underlined. \* $p < 0.05$ ; \*\* $p < 0.01$ ; \*\*\* $p < 0.001$**

using one-way ANOVA (Dunn-Šidák) of C:G to G:C editing against 'Untreated.' Exact p values are available in Source Data. Each dot represents editing of an individual biological replicate; bars represent mean values; error bars represent SEM of three biologically independent replicates.

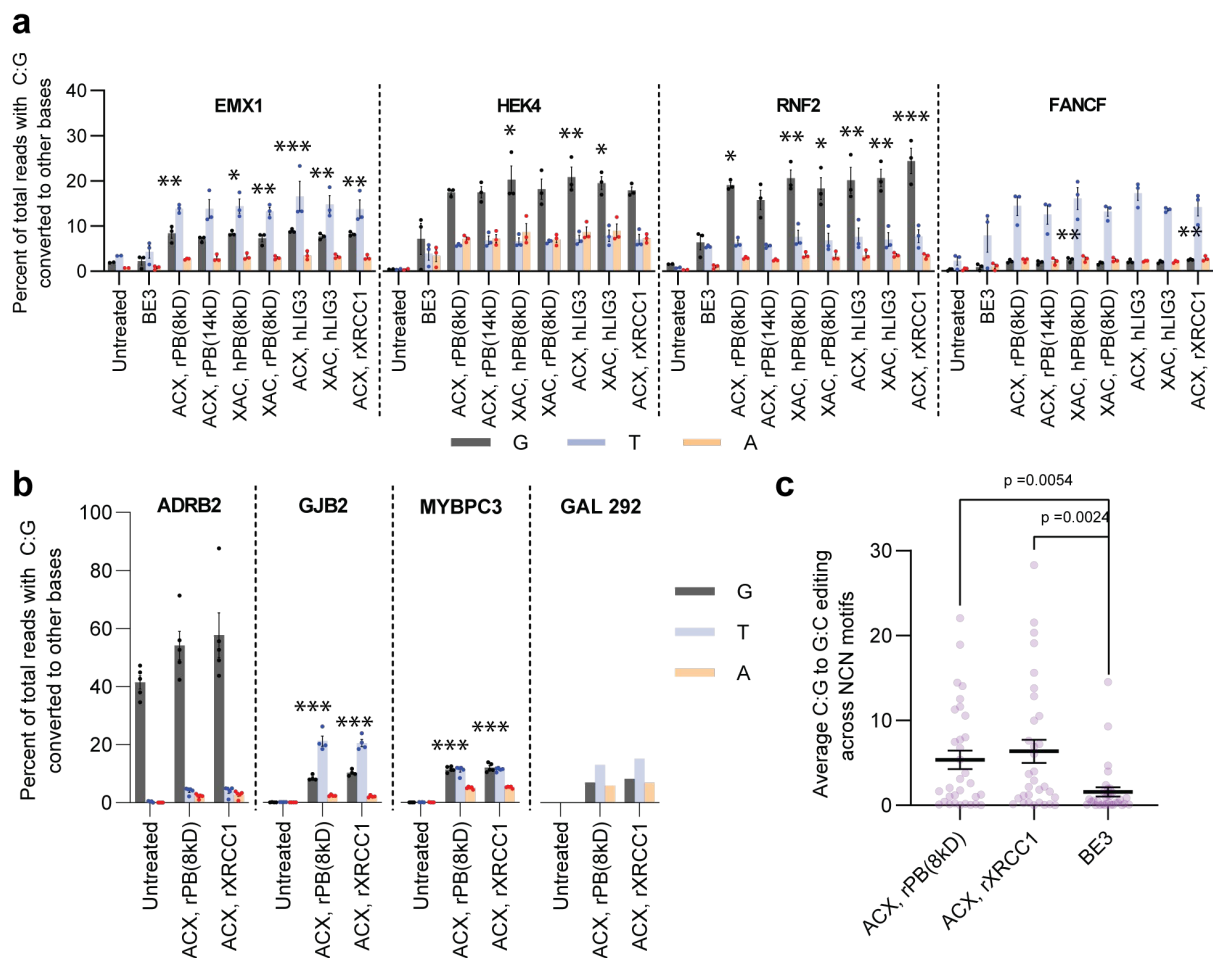

**Supplementary Figure 3. Further characterization of shortlisted CGBE candidates. (a)** CGBE candidates effect C:G to G:C mutations at *EMX1*, *HEK4*, *RNF2*, and *FANCF*. C:G to G:C editing is the main edit at *HEK4* and *RNF2*; C:G to T:A editing is the main edit at *FANCF* and *EMX1*. \* $p < 0.05$ ; \*\* $p < 0.01$ ; \*\*\* $p < 0.001$  using one-way ANOVA (Dunn-Šidák) of C:G to G:C editing against ‘BE3.’ Exact p values are available in Source Data. Each dot represents editing of an individual biological replicate; bars represent mean values; error bars represent SEM of three biologically independent replicates. **(b)** CGBE editing at disease-associated genes *ADRB2*, *GJB2*, *MYBPC3*, and *GAL 292*. Note that *ADRB2* contains naturally occurring polymorphism in HEK293AAV cells, and hence this data is not included in Fig 3. \* $p < 0.05$ ; \*\* $p < 0.01$ ; \*\*\* $p < 0.001$  using one-way ANOVA (Dunn-Šidák) of C:G to G:C editing against ‘Untreated.’ Exact p values are available in Source Data. Each dot represents editing of an individual biological replicate; bars represent mean values; where present, error bars represent SEM of five (*ADRB2* and *MYBPC3*) or four (*GJB2*) biologically independent replicates. **(c)** Mean C:G to G:C editing as a percent of all reads across 16 NCN sites. CGBEs increase C:G to G:C editing by three to four fold compared to BE3, across all possible NCN sequences. p values were obtained via Mann-Whitney tests between indicated editors. Each dot represents C:G to G:C editing with one of the 16 *HEK2* gRNAs in an individual biological replicate. Sequences for the 16 gRNAs are listed in Supplementary Table 2. Lines represent mean values and SEM of 32 biologically independent replicates – each of the 16 gRNAs is tested twice.

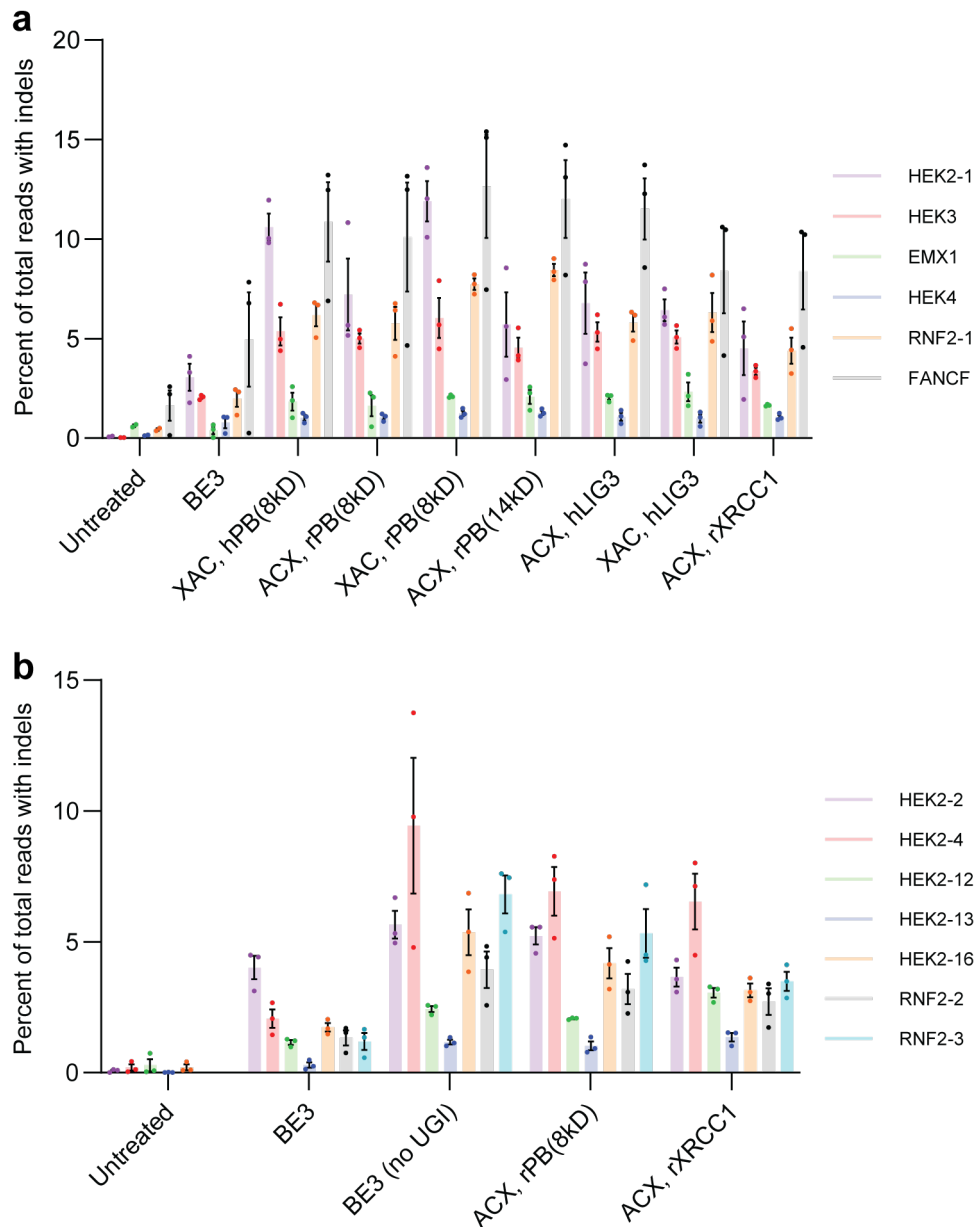

**Supplementary Figure 4. Indel rates of shortlisted CGBE candidates at genomic sites.** (a) CGBE candidates generate higher indel rates than BE3. ACX, rXRCC1 has the lowest indel rate of CGBE candidates. (b) Removing UGI from BE3 increases indel rate; fusing BER proteins rPB(8kD) or rXRCC1 decreases indel rate modestly. An additional set of gRNA:targets used here validates the conclusion from (a). While further mechanistic studies would be necessary, a possible hypothesis is that recruitment of the BER complex repairs abasic sites and the shortened persistence of these abasic sites may then lead to a lower propensity for indels. For both plots, each dot represents indels of an individual biological replicate; bars represent mean values; error bars represent SEM of three biologically independent replicates.

**a** *ADRB2*

| WT | C <sub>1</sub> | C <sub>2</sub> | C <sub>3</sub> | T <sub>4</sub> | T <sub>5</sub> | T <sub>6</sub> | C <sub>7</sub> | C <sub>8</sub> | T <sub>9</sub> | G <sub>10</sub> | C <sub>11</sub> | G <sub>12</sub> | T <sub>13</sub> | G <sub>14</sub> | A <sub>15</sub> | C <sub>16</sub> | G <sub>17</sub> | T <sub>18</sub> | C <sub>19</sub> | G <sub>20</sub> |
|----|----------------|----------------|----------------|----------------|----------------|----------------|----------------|----------------|----------------|-----------------|-----------------|-----------------|-----------------|-----------------|-----------------|-----------------|-----------------|-----------------|-----------------|-----------------|
| A  | 0.0            | 0.0            | 0.0            | 0.1            | 0.0            | 0.0            | 0.1            | 0.0            | 0.0            | 0.1             | 0.0             | 0.2             | 0.1             | 0.1             | 99.8            | 0.0             | 0.3             | 0.0             | 0.0             | 0.2             |
| C  | 99.9           | 99.9           | 99.8           | 0.2            | 0.2            | 0.1            | 54.5           | 99.4           | 0.1            | 0.1             | 99.8            | 0.4             | 0.1             | 0.1             | 0.0             | 99.9            | 0.1             | 0.4             | 99.9            | 0.1             |
| G  | 0.0            | 0.0            | 0.0            | 0.1            | 0.1            | 0.0            | 44.9           | 0.0            | 0.1            | 99.7            | 0.0             | 99.5            | 0.2             | 99.7            | 0.2             | 0.0             | 99.6            | 0.3             | 0.0             | 99.5            |
| T  | 0.1            | 0.1            | 0.1            | 99.6           | 99.7           | 99.9           | 0.6            | 0.5            | 99.7           | 0.1             | 0.2             | 0.0             | 99.5            | 0.0             | 0.1             | 0.1             | 0.1             | 99.3            | 0.1             | 0.2             |

| XRCC | C <sub>1</sub> | C <sub>2</sub> | C <sub>3</sub> | T <sub>4</sub> | T <sub>5</sub> | T <sub>6</sub> | C <sub>7</sub> | C <sub>8</sub> | T <sub>9</sub> | G <sub>10</sub> | C <sub>11</sub> | G <sub>12</sub> | T <sub>13</sub> | G <sub>14</sub> | A <sub>15</sub> | C <sub>16</sub> | G <sub>17</sub> | T <sub>18</sub> | C <sub>19</sub> | G <sub>20</sub> |
|------|----------------|----------------|----------------|----------------|----------------|----------------|----------------|----------------|----------------|-----------------|-----------------|-----------------|-----------------|-----------------|-----------------|-----------------|-----------------|-----------------|-----------------|-----------------|
| A    | 0.1            | 0.0            | 0.1            | 0.0            | 0.1            | 0.0            | 0.7            | 0.1            | 0.0            | 0.1             | 0.0             | 0.3             | 0.0             | 0.1             | 99.8            | 0.0             | 0.2             | 0.0             | 0.0             | 0.3             |
| C    | 99.6           | 99.9           | 99.6           | 0.2            | 0.1            | 0.1            | 10.6           | 99.2           | 0.1            | 0.1             | 99.8            | 0.2             | 0.1             | 0.1             | 0.0             | 99.9            | 0.0             | 0.3             | 99.9            | 0.1             |
| G    | 0.0            | 0.0            | 0.0            | 0.2            | 0.1            | 0.1            | 87.6           | 0.1            | 0.1            | 99.8            | 0.0             | 99.4            | 0.3             | 99.8            | 0.1             | 0.0             | 99.6            | 0.2             | 0.0             | 99.5            |
| T    | 0.3            | 0.1            | 0.3            | 99.6           | 99.7           | 99.8           | 1.1            | 0.6            | 99.8           | 0.1             | 0.2             | 0.0             | 99.6            | 0.0             | 0.1             | 0.1             | 0.1             | 99.4            | 0.1             | 0.2             |

| rPB | C <sub>1</sub> | C <sub>2</sub> | C <sub>3</sub> | T <sub>4</sub> | T <sub>5</sub> | T <sub>6</sub> | C <sub>7</sub> | C <sub>8</sub> | T <sub>9</sub> | G <sub>10</sub> | C <sub>11</sub> | G <sub>12</sub> | T <sub>13</sub> | G <sub>14</sub> | A <sub>15</sub> | C <sub>16</sub> | G <sub>17</sub> | T <sub>18</sub> | C <sub>19</sub> | G <sub>20</sub> |
|-----|----------------|----------------|----------------|----------------|----------------|----------------|----------------|----------------|----------------|-----------------|-----------------|-----------------|-----------------|-----------------|-----------------|-----------------|-----------------|-----------------|-----------------|-----------------|
| A   | 0.1            | 0.0            | 0.1            | 0.0            | 0.1            | 0.0            | 1.0            | 0.3            | 0.1            | 0.1             | 0.0             | 0.2             | 0.1             | 0.1             | 99.7            | 0.0             | 0.3             | 0.0             | 0.0             | 0.2             |
| C   | 99.5           | 99.7           | 99.1           | 0.2            | 0.1            | 0.1            | 25.4           | 98.5           | 0.1            | 0.1             | 99.8            | 0.3             | 0.1             | 0.1             | 0.0             | 99.9            | 0.1             | 0.4             | 99.9            | 0.1             |
| G   | 0.0            | 0.0            | 0.0            | 0.1            | 0.1            | 0.1            | 71.4           | 0.1            | 0.1            | 99.8            | 0.0             | 99.5            | 0.2             | 99.8            | 0.2             | 0.0             | 99.5            | 0.3             | 0.0             | 99.6            |
| T   | 0.4            | 0.3            | 0.7            | 99.6           | 99.7           | 99.8           | 2.2            | 1.1            | 99.7           | 0.1             | 0.2             | 0.0             | 99.6            | 0.1             | 0.1             | 0.1             | 0.1             | 99.3            | 0.1             | 0.1             |

**b** *MYBPC3*

| WT | G <sub>1</sub> | A <sub>2</sub> | T <sub>3</sub> | A <sub>4</sub> | G <sub>5</sub> | A <sub>6</sub> | C <sub>7</sub> | C <sub>8</sub> | T <sub>9</sub> | G <sub>10</sub> | T <sub>11</sub> | G <sub>12</sub> | T <sub>13</sub> | G <sub>14</sub> | C <sub>15</sub> | A <sub>16</sub> | T <sub>17</sub> | G <sub>18</sub> | G <sub>19</sub> | A <sub>20</sub> |
|----|----------------|----------------|----------------|----------------|----------------|----------------|----------------|----------------|----------------|-----------------|-----------------|-----------------|-----------------|-----------------|-----------------|-----------------|-----------------|-----------------|-----------------|-----------------|
| A  | 0.1            | 99.8           | 0.7            | 99.8           | 0.1            | 99.9           | 0.1            | 0.0            | 2.3            | 1.0             | 0.7             | 7.2             | 0.1             | 0.1             | 0.0             | 99.9            | 1.4             | 3.0             | 0.2             | 99.9            |
| C  | 0.0            | 0.0            | 0.0            | 0.0            | 0.1            | 0.0            | 99.7           | 99.6           | 0.1            | 0.0             | 0.0             | 0.0             | 0.0             | 0.0             | 99.2            | 0.0             | 0.0             | 0.0             | 0.0             | 0.0             |
| G  | 99.8           | 0.1            | 0.0            | 0.1            | 99.8           | 0.1            | 0.1            | 0.3            | 0.0            | 99.0            | 0.0             | 92.8            | 0.0             | 99.9            | 0.4             | 0.0             | 0.0             | 97.0            | 99.8            | 0.1             |
| T  | 0.0            | 0.0            | 99.3           | 0.1            | 0.0            | 0.0            | 0.1            | 0.1            | 97.6           | 0.0             | 99.3            | 0.0             | 99.8            | 0.0             | 0.3             | 0.1             | 98.5            | 0.0             | 0.0             | 0.0             |

| XRCC | G <sub>1</sub> | A <sub>2</sub> | T <sub>3</sub> | A <sub>4</sub> | G <sub>5</sub> | A <sub>6</sub> | C <sub>7</sub> | C <sub>8</sub> | T <sub>9</sub> | G <sub>10</sub> | T <sub>11</sub> | G <sub>12</sub> | T <sub>13</sub> | G <sub>14</sub> | C <sub>15</sub> | A <sub>16</sub> | T <sub>17</sub> | G <sub>18</sub> | G <sub>19</sub> | A <sub>20</sub> |
|------|----------------|----------------|----------------|----------------|----------------|----------------|----------------|----------------|----------------|-----------------|-----------------|-----------------|-----------------|-----------------|-----------------|-----------------|-----------------|-----------------|-----------------|-----------------|
| A    | 0.2            | 99.7           | 0.9            | 99.8           | 0.2            | 99.8           | 5.3            | 2.0            | 2.1            | 1.1             | 0.6             | 7.2             | 0.1             | 0.1             | 0.0             | 99.9            | 1.1             | 3.0             | 0.2             | 99.9            |
| C    | 0.2            | 0.1            | 0.1            | 0.0            | 0.1            | 0.0            | 69.4           | 94.0           | 0.1            | 0.1             | 0.0             | 0.0             | 0.1             | 0.0             | 99.3            | 0.0             | 0.0             | 0.0             | 0.0             | 0.0             |
| G    | 99.6           | 0.1            | 0.0            | 0.1            | 99.7           | 0.1            | 13.9           | 1.3            | 0.0            | 98.8            | 0.0             | 92.7            | 0.0             | 99.9            | 0.4             | 0.0             | 0.0             | 97.0            | 99.8            | 0.1             |
| T    | 0.0            | 0.0            | 99.0           | 0.1            | 0.0            | 0.1            | 11.3           | 2.7            | 97.8           | 0.0             | 99.3            | 0.1             | 99.8            | 0.0             | 0.3             | 0.1             | 98.8            | 0.0             | 0.0             | 0.0             |

| rPB | G <sub>1</sub> | A <sub>2</sub> | T <sub>3</sub> | A <sub>4</sub> | G <sub>5</sub> | A <sub>6</sub> | C <sub>7</sub> | C <sub>8</sub> | T <sub>9</sub> | G <sub>10</sub> | T <sub>11</sub> | G <sub>12</sub> | T <sub>13</sub> | G <sub>14</sub> | C <sub>15</sub> | A <sub>16</sub> | T <sub>17</sub> | G <sub>18</sub> | G <sub>19</sub> | A <sub>20</sub> |
|-----|----------------|----------------|----------------|----------------|----------------|----------------|----------------|----------------|----------------|-----------------|-----------------|-----------------|-----------------|-----------------|-----------------|-----------------|-----------------|-----------------|-----------------|-----------------|
| A   | 0.3            | 99.7           | 0.9            | 99.7           | 0.2            | 99.8           | 5.2            | 2.4            | 2.2            | 1.2             | 0.6             | 7.6             | 0.1             | 0.1             | 0.1             | 99.9            | 1.2             | 2.9             | 0.2             | 99.9            |
| C   | 0.1            | 0.1            | 0.1            | 0.0            | 0.1            | 0.0            | 71.1           | 92.9           | 0.1            | 0.1             | 0.1             | 0.0             | 0.0             | 0.0             | 99.2            | 0.0             | 0.0             | 0.0             | 0.0             | 0.0             |
| G   | 99.6           | 0.1            | 0.0            | 0.1            | 99.7           | 0.1            | 12.3           | 1.4            | 0.0            | 98.7            | 0.0             | 92.3            | 0.1             | 99.9            | 0.4             | 0.0             | 0.0             | 97.1            | 99.8            | 0.1             |
| T   | 0.0            | 0.1            | 99.0           | 0.2            | 0.0            | 0.1            | 11.3           | 3.3            | 97.7           | 0.0             | 99.3            | 0.1             | 99.8            | 0.0             | 0.3             | 0.1             | 98.8            | 0.0             | 0.0             | 0.0             |

**Supplementary Figure 5. Representative data of CGBE editing at (a) *ADRB2* and (b) *MYBPC3*. WT denotes wild-type untreated cells; XRCC denotes ACX, XRCC1; rPB denotes ACX, rPB(8kD). Note that *ADRB2* contains naturally occurring polymorphism in HEK293AAV cells.**

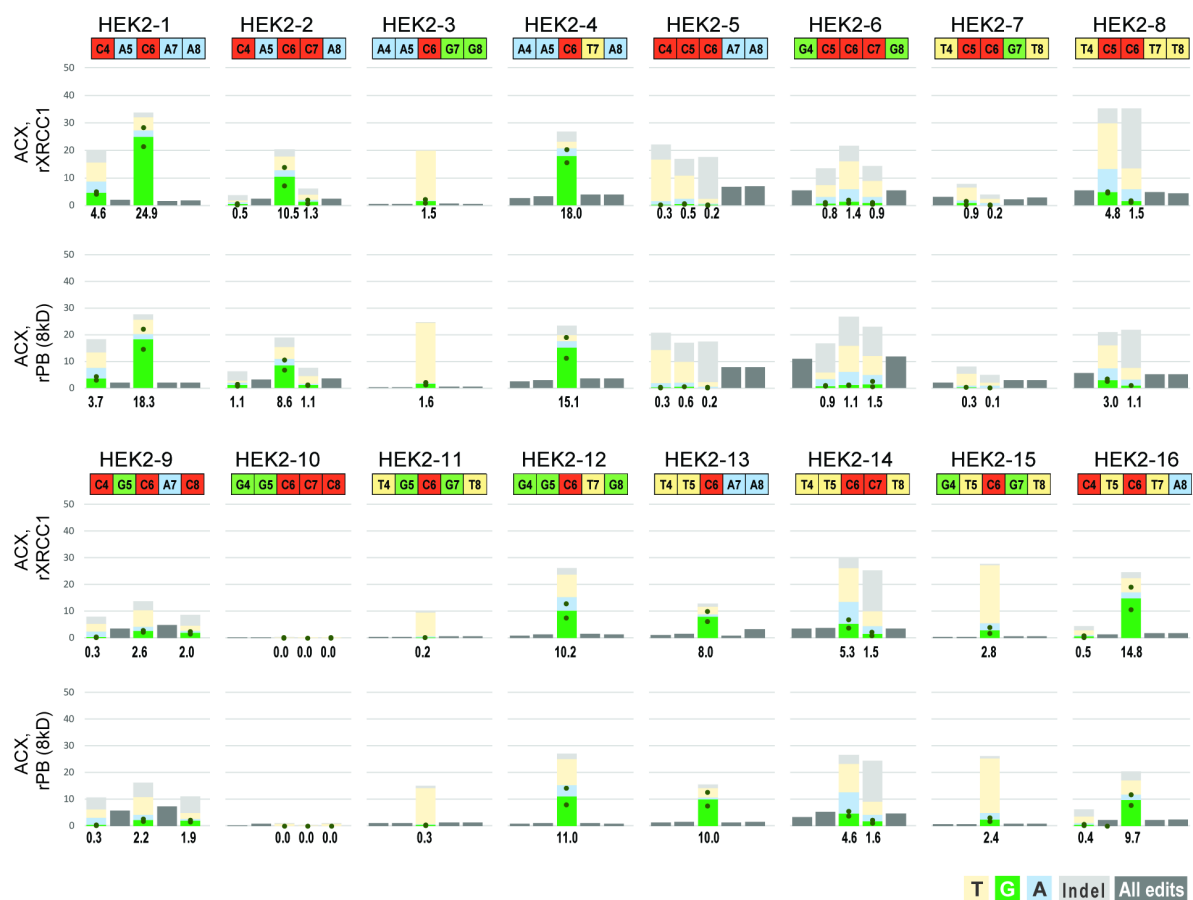

**Supplementary Figure 6. C:G to G:C editing for ACX, rXRCC1 and ACX, rPB(8kD) across 16 NCN gRNA:target combinations.** Editing frequencies on all nucleotides within positions 4 to 8 are depicted, with C6 data reported in Fig 2a. When targeting C's at position 6 (24.9%), the highest bystander C:G to G:C edit observed is 4.8% (HEK2-1, position 4). Full sequences of target sites are available in Supplementary Table 2. Each dot represents C:G to G:C editing of an individual biological replicate; bars represent mean values of two biologically independent replicates.



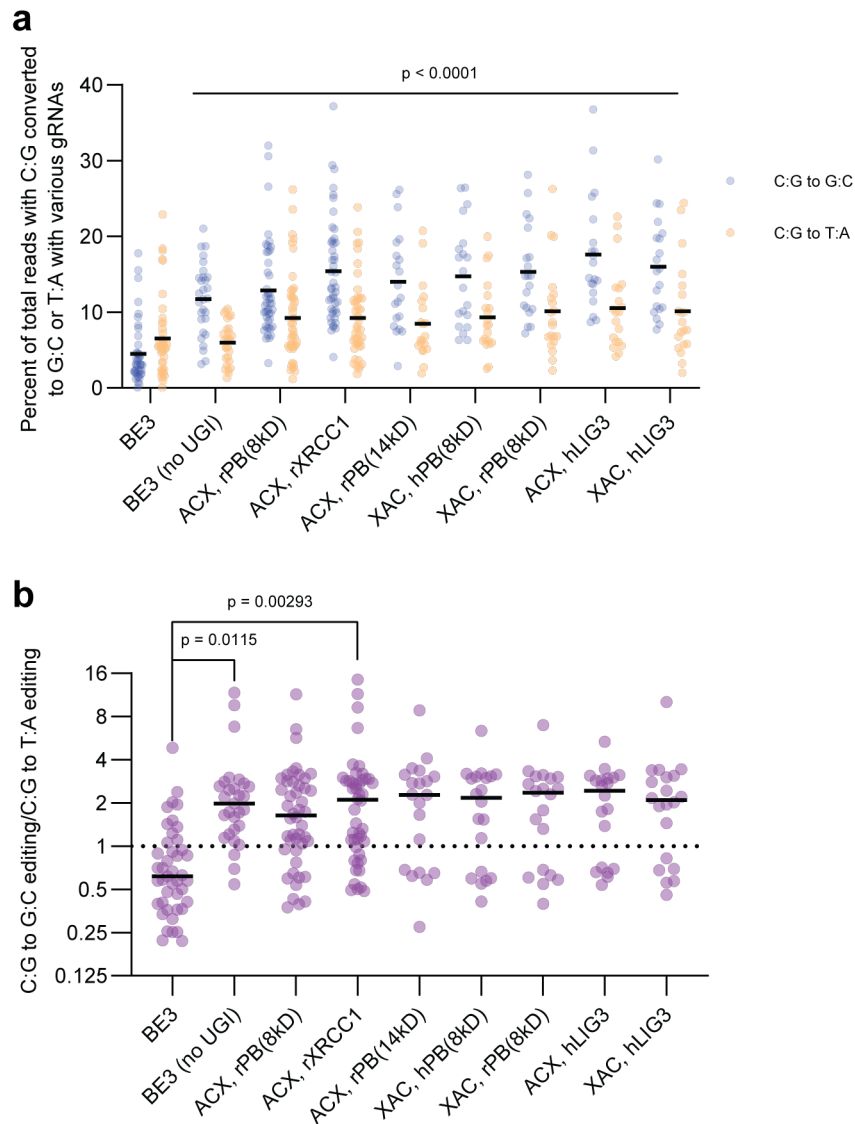

**Supplementary Figure 7. ACX, rXRCC1 is the best performer out of shortlisted CGBE candidates. (a)** C:G to G:C editing (blue) vs. C:G to T:A editing (orange) as percent of all reads across gRNAs used in this study. All biological replicates are included except those targeting the 10 suboptimal C:G to G:C base editing motifs (Figure 2a and Figure 2b) and *ADRB2* due to naturally occurring polymorphism (Supplementary Figure 3b). **(b)** Ratio of C:G to G:C editing/C:G to T:A editing across gRNAs used in this study. Only BE3 (no UGI) and ACX, rXRCC1 give a significantly higher ratio of C:G to G:C editing/C:G to T:A editing. For both plots, p values were obtained via one-way ANOVA (Dunn-Šidák) against ‘BE3.’ Each dot represents editing of an individual biological replicate. Black lines represent mean values of 43 (BE3), 29 (BE3 (no UGI)), 46 (ACX, rPB(8kD) and ACX, rXRCC1), or 20 (the remaining editors) biologically independent replicates.

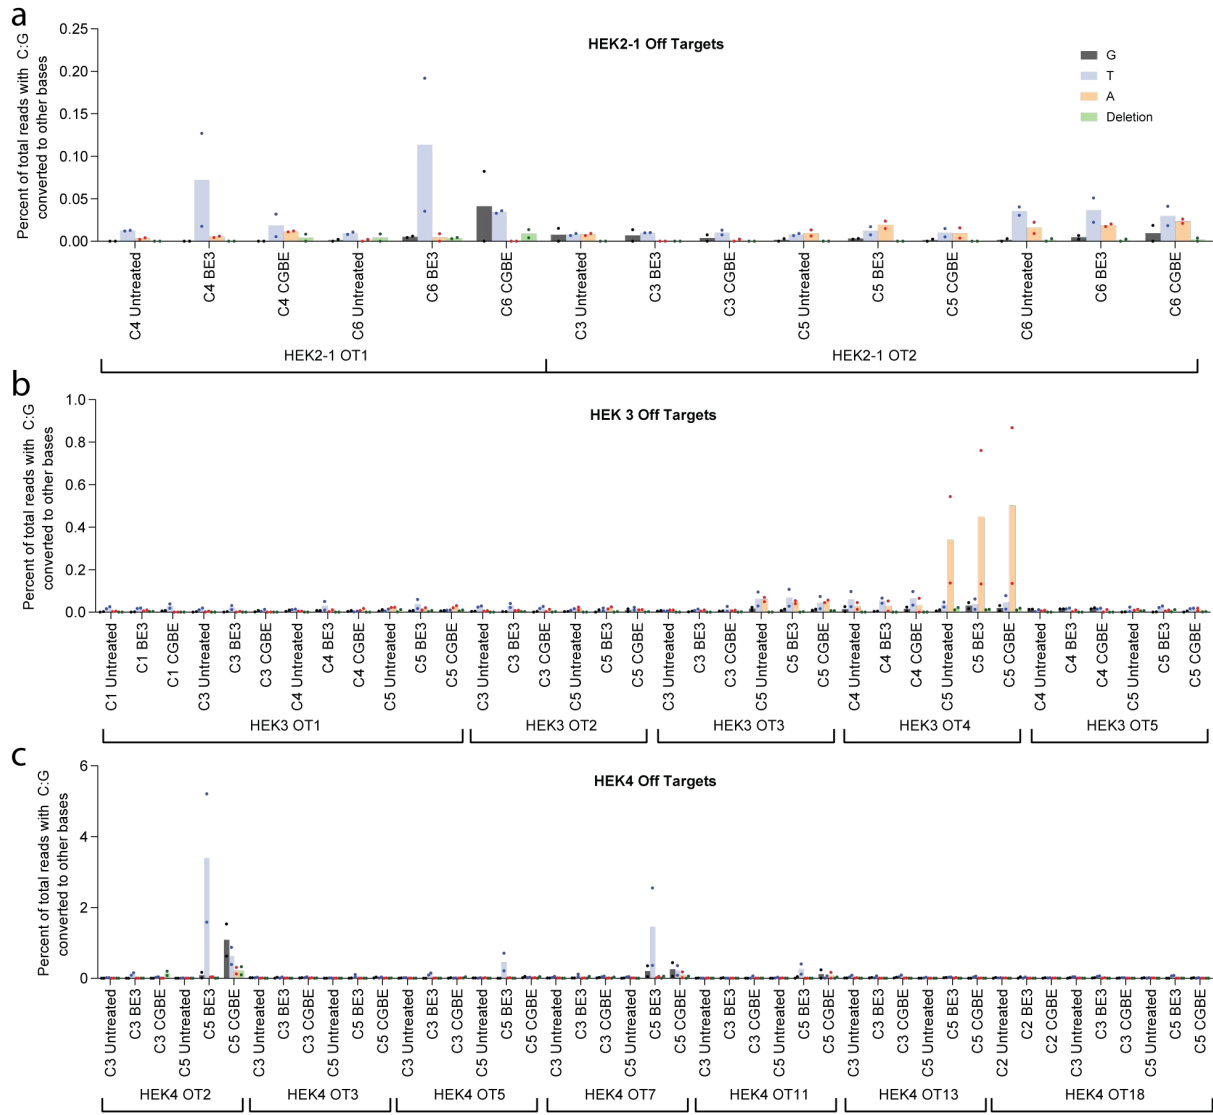

Supplementary Figure 8. Continued on next page

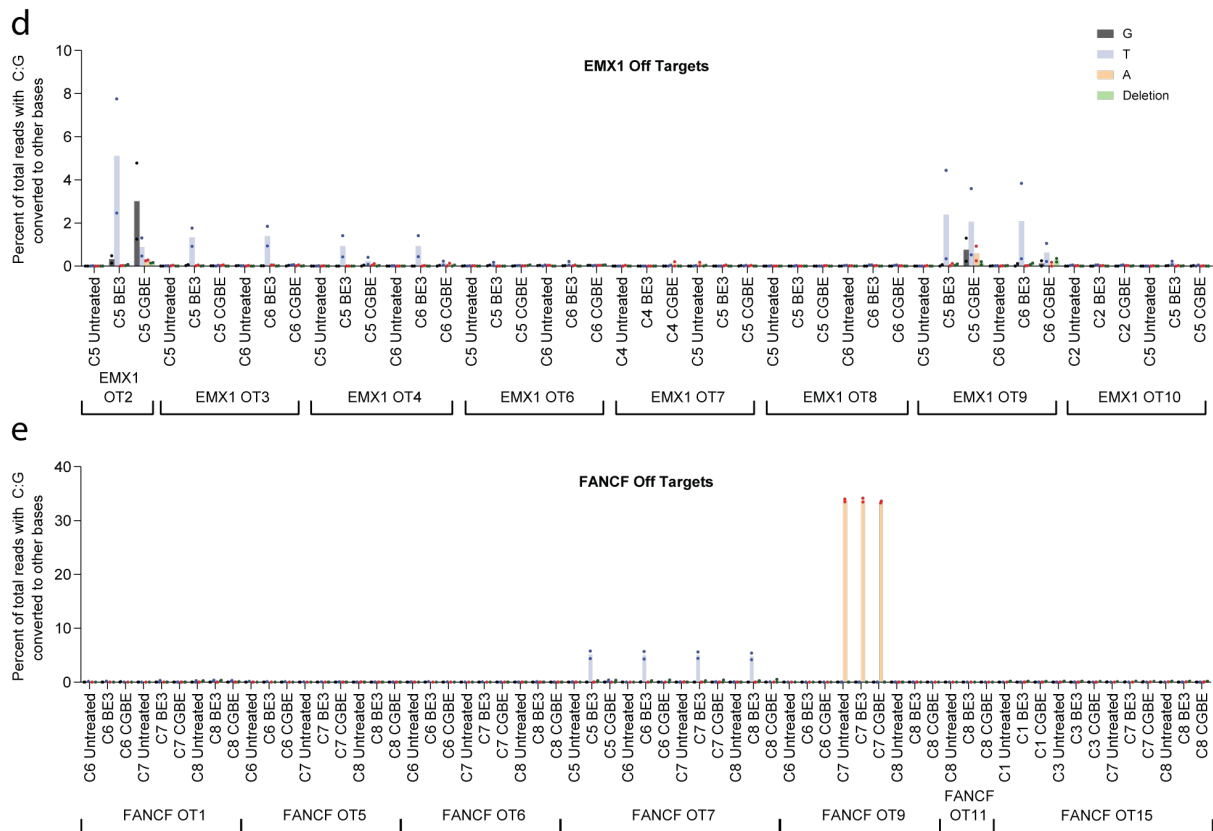

**Supplementary Figure 8. CGBE and BE3 off target activity at identified off-target sites with (a) *HEK2-1* gRNA; (b) *HEK3* gRNA; (c) *HEK4* gRNA; (d) *EMX1*; and (e) *FANCF*.** A total of 29 identified off-target sites with 68 editable C's using 5 gRNAs were tested. *HEK3* and *EMX1* off-target sites are Cas9 off-target sites identified via GUIDE-Seq<sup>1</sup>; *HEK2*, *HEK4*, and *FANCF* off-target sites are BE3 (no UGI) off-target sites identified via Digenome-Seq<sup>2</sup>. CGBE and BE3 induced >0.1% C:G to D:H edits at the same 15 off-target sites. At 2 out of these 15 positions, CGBE induced greater off-target editing frequency than BE3; at the remaining 13 sites, CGBE induced lower off-target editing frequency. 'OT5' indicates off-target 5; 'C4' indicates a 'C' at position 4. Each dot represents editing of an individual biological replicate; bars represent mean values of two biologically independent replicates.

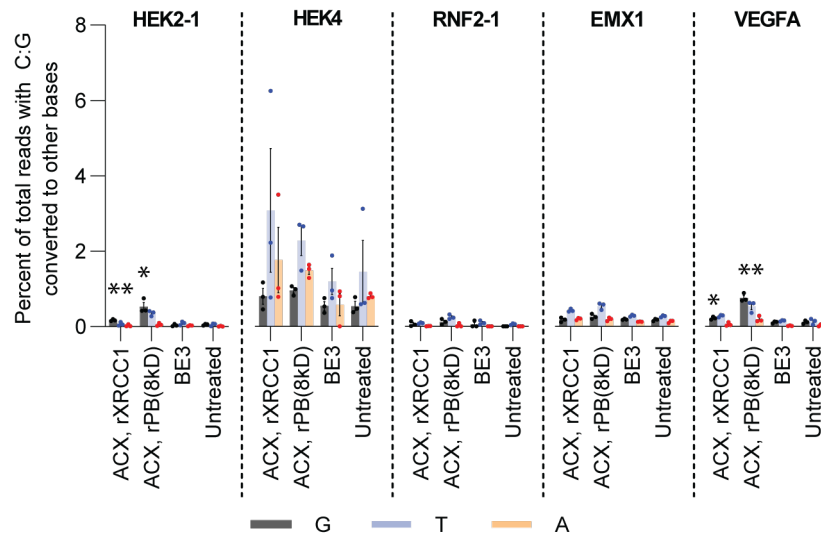

**Supplementary Figure 9. ACX, rXRCC1; ACX, rPB(8kD); and BE3 exhibit low editing efficiencies in H9 stem cells.** Without further engineering (via codon optimization, APOBEC mutation etc.), BE3 is inefficient at inducing C:G to T:A edits in H9 stem cells. The highest C:G to T:A editing observed with BE3 is at HEK4 (1.2%). Similarly, both CGBEs are not efficient at inducing C:G to G:C edits, with the highest edits also at HEK4. Zeng et al recently showed that the engineered human APOBEC3A can increase BE3 editing in stem cells<sup>3</sup>, suggesting that a similar approach might also induce higher CGBE stem cell editing. \* $p < 0.05$ ; \*\* $p < 0.01$  using two-tailed Student's t Test of C:G to G:C editing against 'Untreated.' Exact p values are available in Source Data. Each dot represents editing of an individual biological replicate; bars represent mean values; error bars represent SEM of three biologically independent replicates.

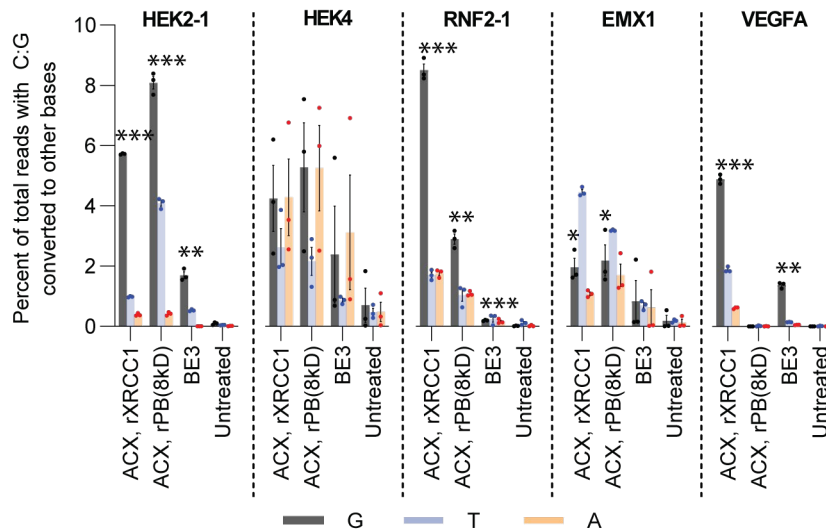

**Supplementary Figure 10. ACX, rXRCC1; ACX, rPB(8kD); and BE3 editing in eHAP cells.** Although BE3 editing is low, we observed moderate levels of editing with both CGBEs. These results suggest that CGBE may be able to induce some C:G to G:C edits in certain circumstances under which different base editing technology – like BE3 – may not be as efficient (C:G to T:A edits; light blue). \* $p < 0.05$ ; \*\* $p < 0.01$ ; \*\*\* $p < 0.001$  using two-tailed Student's t Test of C:G to G:C editing against 'Untreated.' Exact p values are available in Source Data. Each dot represents editing of an individual biological replicate; bars represent mean values; error bars represent SEM of three biologically independent replicates.

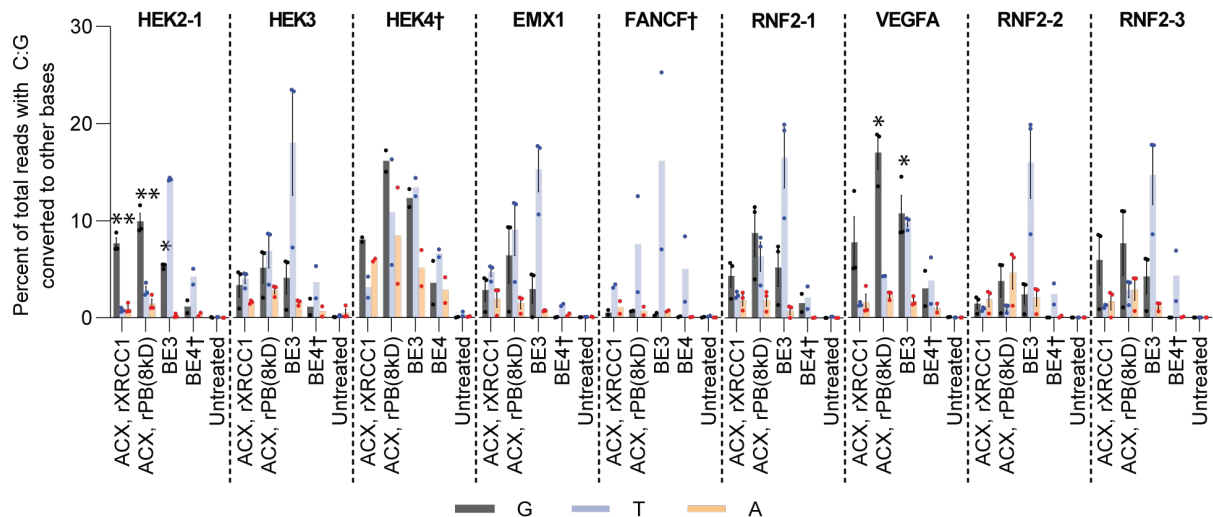

**Supplementary Figure 11. ACX, rXRCC1; ACX, rPB(8kD); and BE3 editing in HTB9 cells.** CGBEs are able to efficiently induce C:G to G:C edits at *HEK2-1*, *HEK4*, *RNF2-1*, and *VEGFA*. Additionally, C6 editing (*RNF2-3*) appears to be higher than C5 editing (*RNF2-2*). Collectively, the data indicate that the editing preferences of CGBEs in HEK cells carry over to HTB9 cells. The more efficient CGBE in HTB9 cells is ACX, rPB(8kD). \* $p < 0.05$ ; \*\* $p < 0.01$ ; \*\*\* $p < 0.001$  using two-tailed Student's t Test of C:G to G:C editing against 'Untreated.' Exact p values are available in Source Data. Each dot represents editing of an individual biological replicate; bars represent mean values; where present, error bars represent SEM of three biologically independent replicates († indicates two biologically independent repeats).

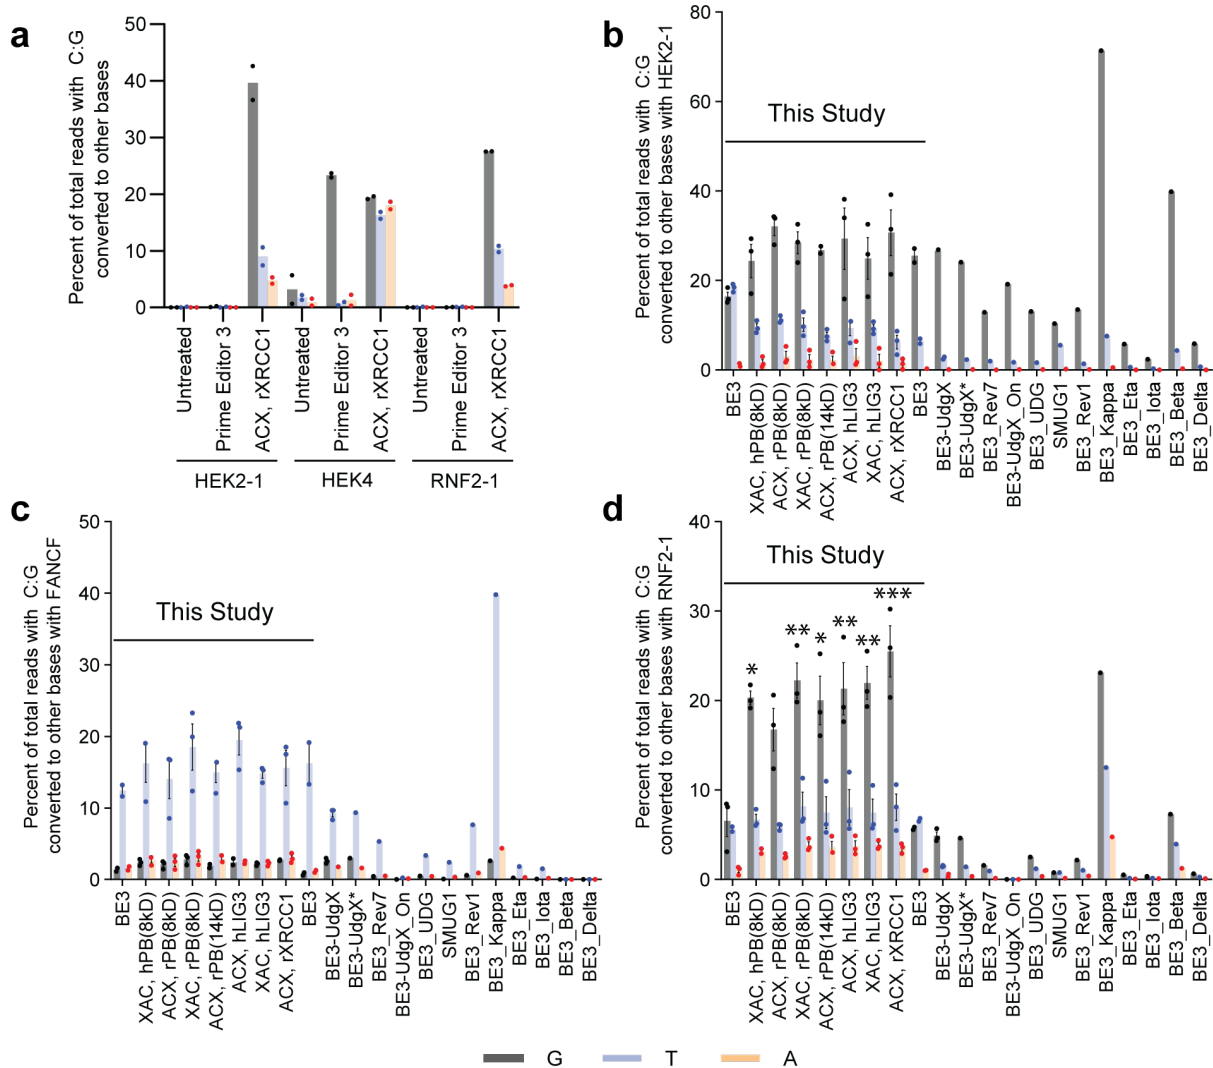

**Supplementary Figure 12. Comparison of our CGBE to (a) PE3 described in Anzalone et al., and CGBEs described in Liu and Koblan at (b) *HEK2*, (c) *FANCF*, and (d) *RNF2*.** (a) For C:G to G:C editing, PE3 is as efficient as CGBE (ACX, rXRCC1) and induced lower levels of undesired edits at *HEK4*. At *HEK2-1* and *RNF2-1*, PE3 is substantially less efficient than CGBE at *HEK2* and *RNF2*. Our results indicate that while PE3 may be able to perform C:G to G:C transversions at some sites, CGBE is a valuable tool to expand the editing capabilities of current technologies. For parts b, c, and d, since datasets were generated independently and in different cell types, comparisons should be made only against BE3 common to the two studies. Fusion of base excision enzymes such as UDG and UdgX decreases C:G to G:C editing beyond BE3 at 2 of 3 sites (n=1; Liu and Koblan<sup>4</sup>). Fusion of base excision repair enzymes such as rXRCC1 increases C:G to G:C editing beyond BE3. For part d, \*p < 0.05; \*\*p < 0.01; \*\*\*p < 0.001 one-way ANOVA (Dunn-Šidák) of C:G to G:C editing against ‘BE3.’ For all plots, each dot represents editing of an individual biological replicate; bars represent mean values; where present, error bars represent SEM of three biologically independent samples.

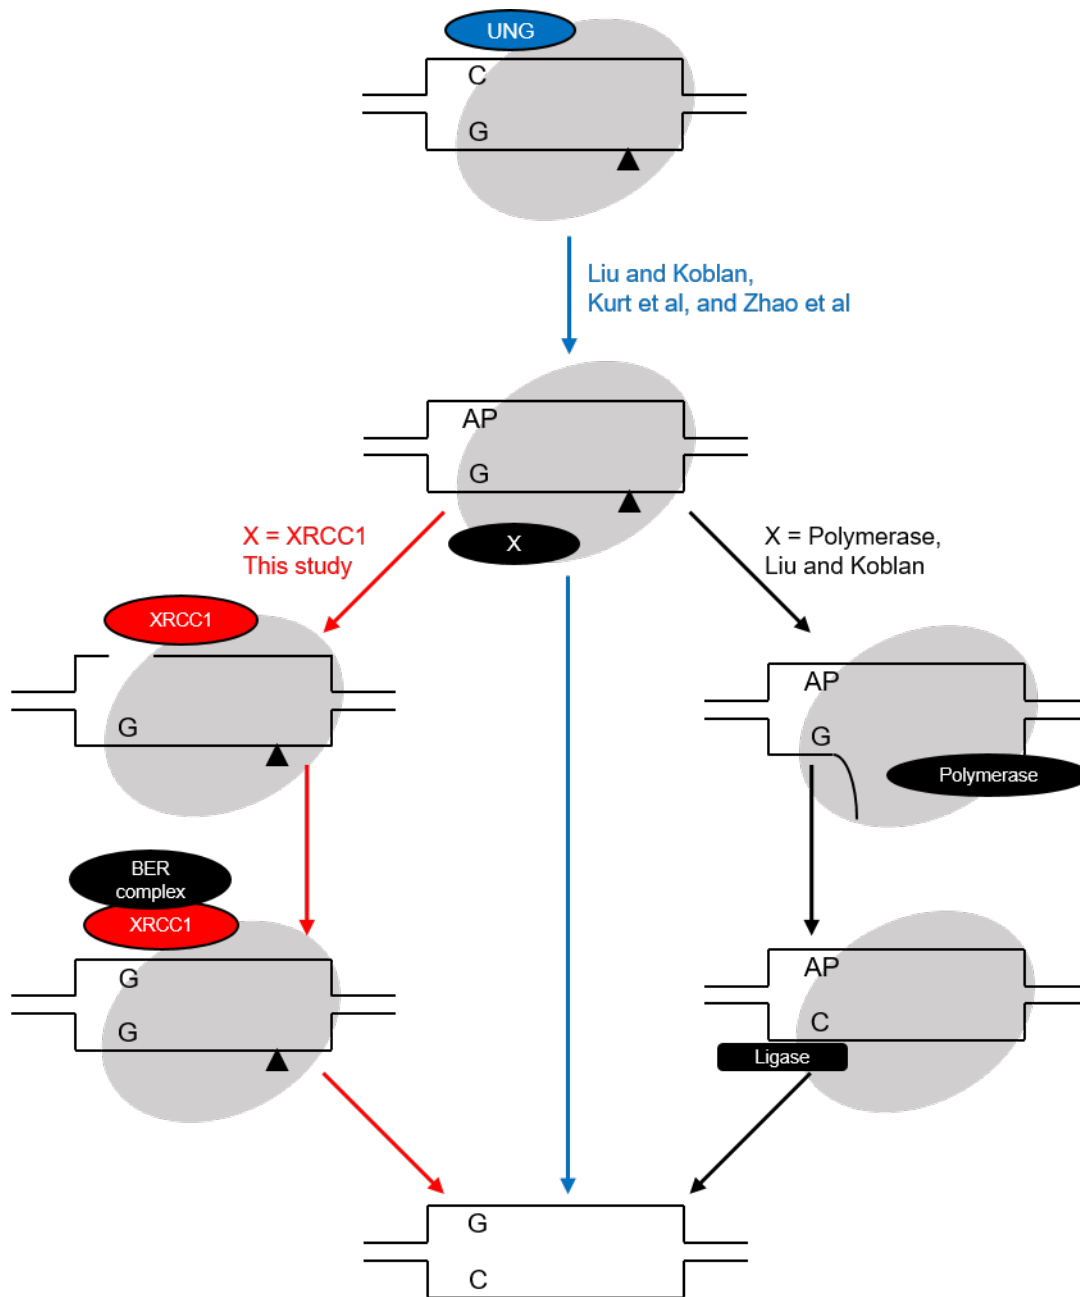

**Supplementary Figure 13. Distinct strategies for CGBE design.** This study employs a CGBE design strategy (left, red arrows) where Cas9 is fused to protein(s) involved in repairing uracil-containing or abasic sites (AP). The activities of these BER proteins are expected to convert the AP to G before the nucleotide on the opposite strand is converted from G to C. In contrast, the polymerase strategy employed by Liu and Koblan<sup>4</sup> (right, black arrows) seeks to maintain the abasic site throughout a translesion synthesis envisioned to occur on the opposite strand. The AP is repaired after the nucleotide on the opposite strand is converted from G to C. The UNG-based CGBE strategy employed by Kurt et al<sup>5</sup>, Zhao et al<sup>6</sup>, and Liu and Koblan seeks to facilitate the generation of the AP site (middle, blue arrows). In other words, this study employs proteins that repair and not maintain/generate abasic sites whereas other studies employ proteins that generate/maintain and not repair abasic sites. CGBEs were designed based on working hypotheses derived from known Cas9 and BER chemistries that warrants future mechanistic studies.



**Supplementary Table 1. CGBEs enable potential treatment avenues to previously unaddressable SNPs associated with human diseases.** CBE enables treatment to 48% of all known disease-associated SNPs in ClinVar, while ABE enables treatment to 6%. CGBEs effect primarily C:G to G:C and G:C to C:G changes (yellow highlight) that can correct 11% of disease-associated SNPs. In combination with CBEs or ABEs, CGBEs effect secondarily G to T, C to A, A to C, and T to G edits (green highlight). With CBEs, ABEs, and CGBEs, the remaining 7% of SNPs (A to T and T to A) can also be corrected (orange highlight).

| From | To | % of SNPs in ClinVar | Equivalent to |   | Base-editing route for correction         |
|------|----|----------------------|---------------|---|-------------------------------------------|
| A    | T  | 7                    | T             | A | A to G (ABE), G to C (CGBE), C to T (CBE) |
|      | G  | 48                   |               | C | ABE                                       |
|      | C  | 15                   |               | G | C to G (CGBE), G to A (CBE)               |
| G    | A  | 6                    | C             | T | CBE                                       |
|      | T  | 14                   |               | A | A to G (ABE), G to C (CGBE)               |
|      | C  | 11                   |               | G | CGBE                                      |

**Supplementary Table 2. Target protospacer sequences used in this study. Targeted C's are underlined. PAMs are in bold.**

| Name    | Target Sequences and PAMs                  |
|---------|--------------------------------------------|
| EMX1    | GAGT <u>CC</u> GAGCAGAAGAAG <b>AGGG</b>    |
| FANCF   | GGAAT <u>CC</u> CTTCTGCAGCAC <b>CTGG</b>   |
| HEK2-1  | GAACACAAAGCATAGACTGC <b>GGG</b>            |
| HEK2-2  | GAGC <u>ACC</u> CACACCCTAAACTAT <b>TGG</b> |
| HEK2-3  | GGAAACGGATAGTTCTGAA <b>AGGG</b>            |
| HEK2-4  | CTTA <u>ACT</u> TATTTGTATTCCACT <b>TGG</b> |
| HEK2-5  | CTT <u>CCC</u> AAGTGAGAAGCCAG <b>TGG</b>   |
| HEK2-6  | CCAG <u>CCC</u> GCTGGCCCTGTAA <b>AGG</b>   |
| HEK2-7  | CAT <u>TCC</u> GTTATTTTACATAT <b>TGG</b>   |
| HEK2-8  | GTT <u>TCC</u> TTTACAGGGCCAGC <b>GGG</b>   |
| HEK2-9  | ATACGCACAGTTTGACAGAT <b>GGG</b>            |
| HEK2-10 | GCTG <u>GCC</u> CTGTAAAGGAAACT <b>TGG</b>  |
| HEK2-11 | GCATG <u>CGT</u> GTGTGTTAAGC <b>TGG</b>    |
| HEK2-12 | TTGGGCTGCAGTAACTTGA <b>AGGG</b>            |
| HEK2-13 | TCTTT <u>CA</u> AGCAGGTGATTAC <b>AGG</b>   |
| HEK2-14 | AGTT <u>TCC</u> TTTACAGGGCCAG <b>CGG</b>   |
| HEK2-15 | GAGGTCGTGGCTGAGCACA <b>AGGG</b>            |
| HEK2-16 | GGCCTCTATTGTTGGTAGAA <b>TGG</b>            |
| HEK3    | GG <u>CCC</u> CAGACTGAGCACGTGAT <b>TGG</b> |
| HEK4    | GGCACTGCGGCTGGAGGTGG <b>GGG</b>            |
| RNF2-1  | GTCAT <u>C</u> TTAGTCATTACCTG <b>AGG</b>   |
| RNF2-2  | <u>CACACACACT</u> TAGAATCTGT <b>GGG</b>    |
| RNF2-3  | ACACACACACTTAGAATCTGT <b>TGG</b>           |
| GJB2    | GGACACGAAGATCAGCTGC <b>AGGG</b>            |
| ADRB2   | CC <u>TTT</u> CCTGCGTGACGTCG <b>TGG</b>    |
| MYBPC3  | CC <u>TTT</u> CCTGCGTGACGTCG <b>TGG</b>    |
| GAL 292 | GAAGT <u>C</u> GTTGTCAAACAGGA <b>AGG</b>   |
| VEGFA-1 | GATGT <u>C</u> TGCAGGCCAGATG <b>AGGG</b>   |

**Supplementary Table 3. HTS Primers used in this study.** PCR1 of the iSeq sample preparation uses primers listed below. The red parts are common to all HTS primers. They serve as priming regions for PCR2 (barcoding). Depending on the barcoding primers used, the red parts should be varied accordingly. The black parts of the HTS primers are unique to the genomic locus that the primers are meant to amplify.

| Name  | Primer Sequence                                                 | Used for                                                       |
|-------|-----------------------------------------------------------------|----------------------------------------------------------------|
| LC041 | CTTTCCTACACGACGCTCTTCCGATCTNNNNNNATGTGG<br>GCTGCCTAGAAAGG       | Forward primer, HTS,<br>HEK3                                   |
| LC042 | GGAGTTCAGACGTGTGCTCTTCCGATCTCCCAGCCAAACT<br>TGTC AACC           | Reverse primer, HTS,<br>HEK3                                   |
| LC183 | CTTTCCTACACGACGCTCTTCCGATCTNNNNNNCCAGCC<br>CCATCTGTCAAAC T      | Forward primer, HTS,<br>HEK2-1, -6, -7, -8, -<br>10, -12, -14  |
| LC184 | GGAGTTCAGACGTGTGCTCTTCCGATCTTGAATGGATTCC<br>TTGGAAACAATGA       | Reverse primer, HTS,<br>HEK2-1, -4, -5, -9                     |
| LC231 | CTTTCCTACACGACGCTCTTCCGATCTNNNNNNTAGTCT<br>TTCAAGCAGGTGATTACAGG | Forward primer 2,<br>HTS, HEK2-1, -4, -5,<br>-9                |
| LC232 | GGAGTTCAGACGTGTGCTCTTCCGATCTCTACCAACAATA<br>GAGGCCCATTA A       | Reverse primer 2,<br>HTS, HEK2-1, -6, -7,<br>-8, -10, -12, -14 |
| LC256 | CTTTCCTACACGACGCTCTTCCGATCTNNNNNNCAGCTC<br>AGCCTGAGTGTTGA       | Forward primer, HTS,<br>EMX1                                   |
| LC257 | GGAGTTCAGACGTGTGCTCTTCCGATCTCTCGTGGGTTTG<br>TGTTGC              | Reverse primer, HTS,<br>EMX1                                   |
| LC258 | CTTTCCTACACGACGCTCTTCCGATCTNNNNNNACGTAG<br>GAATTTTGGTGGGACA     | Forward primer, HTS,<br>RNF2-1                                 |
| LC259 | GGAGTTCAGACGTGTGCTCTTCCGATCTACGTCTCATATG<br>CCCCTTGG            | Reverse primer, HTS,<br>RNF2-1                                 |
| LC260 | CTTTCCTACACGACGCTCTTCCGATCTNNNNNNCATTGC<br>AGAGAGGCGTATCA       | Forward primer, HTS,<br>FANCF                                  |
| LC261 | GGAGTTCAGACGTGTGCTCTTCCGATCTGGGGTCCCAGGT<br>GCTGAC              | Reverse primer, HTS,<br>FANCF                                  |
| LC262 | CTTTCCTACACGACGCTCTTCCGATCTNNNNNNGAACCC<br>AGGTAGCCAGAGAC       | Forward primer, HTS,<br>HEK4                                   |
| LC263 | GGAGTTCAGACGTGTGCTCTTCCGATCTTCCTTTCAACCC<br>GAACGGAG            | Reverse primer, HTS,<br>HEK4                                   |
| LC266 | CTTTCCTACACGACGCTCTTCCGATCTNNNNNNGCAGGG<br>CTAATAAATGGTCTGTG    | Forward Primer, HTS,<br>HEK2-15                                |
| LC267 | GGAGTTCAGACGTGTGCTCTTCCGATCTCGGTCTACATC<br>ACCCCTTCT            | Reverse Primer, HTS,<br>HEK2-15                                |
| LC268 | CTTTCCTACACGACGCTCTTCCGATCTNNNNNNCACATT<br>GGAGTGTCCAGTTGGT     | Forward Primer, HTS,<br>HEK2-3                                 |
| LC269 | GGAGTTCAGACGTGTGCTCTTCCGATCTGGAAGACAACAT<br>GTTTCCCCCAT         | Reverse Primer, HTS,<br>HEK2-3                                 |
| LC270 | CTTTCCTACACGACGCTCTTCCGATCTNNNNNNACAGGG<br>GAAGGTAAGTTTGGG      | Forward Primer, HTS,<br>HEK2-2                                 |
| LC271 | GGAGTTCAGACGTGTGCTCTTCCGATCTAGGTCTCAGATA<br>CAGCCTGA            | Reverse Primer, HTS,<br>HEK2-2                                 |
| LC272 | CTTTCCTACACGACGCTCTTCCGATCTNNNNNNTCGGTG<br>AATTTTAATTGAGTTGTGT  | Forward Primer, HTS,<br>HEK2-11                                |
| LC273 | GGAGTTCAGACGTGTGCTCTTCCGATCTACTAGCTGAGCT<br>TTTGTGTCCA          | Reverse Primer, HTS,<br>HEK2-11                                |
| LC274 | CTTTCCTACACGACGCTCTTCCGATCTNNNNNNTGCTCC<br>CCTCAGCATT CAGC      | Forward Primer, HTS,<br>HEK2-13                                |

|          |                                                               |                                   |
|----------|---------------------------------------------------------------|-----------------------------------|
| LC275    | GGAGTTCAGACGTGTGCTCTTCCGATCTACTGGAACACAA<br>AGCATAGACTGC      | Reverse Primer, HTS,<br>HEK2-13   |
| LC276    | CTTTCCTACACGACGCTCTTCCGATCTNNNNNNCATTC<br>GTTATTTTACATATTGGGC | Forward Primer, HTS,<br>HEK2-16   |
| LC277    | GGAGTTCAGACGTGTGCTCTTCCGATCTACATTTGGGCTT<br>CTTTCTAGTTGA      | Reverse Primer, HTS,<br>HEK2-16   |
| LC302    | CTTTCCTACACGACGCTCTTCCGATCTNNNNNNAAAATC<br>TCAGCGCTTTCGTCC    | Forward Primer, HTS,<br>RNF2-2,-3 |
| LC303    | GGAGTTCAGACGTGTGCTCTTCCGATCTGTCTTAGGAAGT<br>TTCAGGGCTGG       | Reverse Primer, HTS,<br>RNF2-2,-3 |
| LC402    | CTTTCCTACACGACGCTCTTCCGATCTNNNNNNCAAAGG<br>ACCCAGTCACTCC      | Forward primer, HTS,<br>VEGFA     |
| LC403    | GGAGTTCAGACGTGTGCTCTTCCGATCTTTTGCTCCTGGA<br>CCCCCTAT          | Reverse primer, HTS,<br>VEGFA     |
| HEK2_1_F | CTTTCCTACACGACGCTCTTCCGATCTNNNNNNAGTGTG<br>GAGAGTGAGTAAGCCAG  | Forward primer<br>HEK2 OFT1       |
| HEK2_1_R | GGAGTTCAGACGTGTGCTCTTCCGATCTTCTAACGGTAGG<br>ATGATTTTCAAGCA    | Reverse primer<br>HEK2 OFT1       |
| HEK2_2_F | CTTTCCTACACGACGCTCTTCCGATCTNNNNNNAGGAAA<br>AGCAACGTGAGCCTTAAA | Forward primer<br>HEK2 OFT2       |
| HEK2_2_R | GGAGTTCAGACGTGTGCTCTTCCGATCTTCCTCCTAAAAG<br>CCTCCATTACC       | Reverse primer<br>HEK2 OFT2       |
| HEK3_1_F | CTTTCCTACACGACGCTCTTCCGATCTNNNNNNTCCCCT<br>GTTGACCTGGAGAA     | Forward primer<br>HEK3 OFT1       |
| HEK3_1_R | GGAGTTCAGACGTGTGCTCTTCCGATCTCACTGTACTTGC<br>CCTGACCA          | Reverse primer<br>HEK3 OFT1       |
| HEK3_2_F | CTTTCCTACACGACGCTCTTCCGATCTNNNNNNTTGGTG<br>TTGACAGGGAGCAA     | Forward primer<br>HEK3 OFT2       |
| HEK3_2_R | GGAGTTCAGACGTGTGCTCTTCCGATCTCTGAGATGTGGG<br>CAGAAGGG          | Reverse primer<br>HEK3 OFT2       |
| HEK3_3_F | CTTTCCTACACGACGCTCTTCCGATCTNNNNNNTGAGAG<br>GGAACAGAAGGGCT     | Forward primer<br>HEK3 OFT3       |
| HEK3_3_R | GGAGTTCAGACGTGTGCTCTTCCGATCTGTCCAAAGGCC<br>AAGAACCT           | Reverse primer<br>HEK3 OFT3       |
| HEK3_4_F | CTTTCCTACACGACGCTCTTCCGATCTNNNNNNCCTAGC<br>ACTTTGGAAGGTCG     | Forward primer<br>HEK3 OFT4       |
| HEK3_4_R | GGAGTTCAGACGTGTGCTCTTCCGATCTGCTCATCTTAAT<br>CTGCTCAGCC        | Reverse primer<br>HEK3 OFT4       |
| HEK3_5_F | CTTTCCTACACGACGCTCTTCCGATCTNNNNNNAAAGGA<br>GCAGCTCTTCTG       | Forward primer<br>HEK3 OFT5       |
| HEK3_5_R | GGAGTTCAGACGTGTGCTCTTCCGATCTGTCTGCACCATC<br>TCCCACAA          | Reverse primer<br>HEK3 OFT5       |
| HEK4_2_F | CTTTCCTACACGACGCTCTTCCGATCTNNNNNNGGACCC<br>TATTCGGGGCATGG     | Forward primer<br>HEK4 OFT2       |
| HEK4_2_R | GGAGTTCAGACGTGTGCTCTTCCGATCTTGATAGAAGCGG<br>ACCCACAT          | Reverse primer<br>HEK4 OFT2       |
| HEK4_3_F | CTTTCCTACACGACGCTCTTCCGATCTNNNNNNGTGTCC<br>CATGGAGGCTGCT      | Forward primer<br>HEK4 OFT3       |
| HEK4_3_R | GGAGTTCAGACGTGTGCTCTTCCGATCTCCAGGCTGTGGT<br>AGGGACTC          | Reverse primer<br>HEK4 OFT3       |
| HEK4_5_F | CTTTCCTACACGACGCTCTTCCGATCTNNNNNNCGTAGC<br>TTCAGGACGGCCC      | Forward primer<br>HEK4 OFT5       |
| HEK4_5_R | GGAGTTCAGACGTGTGCTCTTCCGATCTTCCCTGGTCCA<br>CACTGACAC          | Reverse primer<br>HEK4 OFT5       |
| HEK4_7_F | CTTTCCTACACGACGCTCTTCCGATCTNNNNNNGCACCT<br>GTGAAACCACAGCC     | Forward primer<br>HEK4 OFT7       |
| HEK4_7_R | GGAGTTCAGACGTGTGCTCTTCCGATCTCCCCTTGCACTC<br>CCTGTCTT          | Reverse primer<br>HEK4 OFT7       |

|           |                                                            |                              |
|-----------|------------------------------------------------------------|------------------------------|
| HEK4_11_F | CTTTCCTACACGACGCTCTCCGATCTNNNNNNCTGGA<br>GGTCTACTGGACGGG   | Forward primer<br>HEK4 OFT11 |
| HEK4_11_R | GGAGTTCAGACGTGTGCTCTCCGATCTCACGGCCCTCC<br>CAGTTTATAG       | Reverse primer<br>HEK4 OFT11 |
| HEK4_13_F | CTTTCCTACACGACGCTCTCCGATCTNNNNNNCAGAGA<br>GGTGAGAGGCAGGC   | Forward primer<br>HEK4 OFT13 |
| HEK4_13_R | GGAGTTCAGACGTGTGCTCTCCGATCTCTGCTGGCCTA<br>AGCCATCT         | Reverse primer<br>HEK4 OFT13 |
| HEK4_18_F | CTTTCCTACACGACGCTCTCCGATCTNNNNNNGGAGAC<br>ACGGCTGAAGATCTGA | Forward primer<br>HEK4 OFT18 |
| HEK4_18_R | GGAGTTCAGACGTGTGCTCTCCGATCTTCCCAGGCAAC<br>CCAAAGAG         | Reverse primer<br>HEK4 OFT18 |
| EMX1_1_F  | CTTTCCTACACGACGCTCTCCGATCTNNNNNNTGCCCA<br>ATCATTGATGCTTTT  | Forward primer EMX1_1        |
| EMX1_1_R  | GGAGTTCAGACGTGTGCTCTCCGATCTAGAAACATTTAC<br>CATAGACTATCACCT | Reverse primer EMX1_1        |
| EMX1_2_F  | CTTTCCTACACGACGCTCTCCGATCTNNNNNNAGTAGC<br>CTCTTTCTCAATGTGC | Forward primer EMX1_2        |
| EMX1_2_R  | GGAGTTCAGACGTGTGCTCTCCGATCTGCTTTCACAAGG<br>ATGCAGTCT       | Reverse primer EMX1_2        |
| EMX1_3_F  | CTTTCCTACACGACGCTCTCCGATCTNNNNNNGAGCTA<br>GACTCCGAGGGGA    | Forward primer EMX1_3        |
| EMX1_3_R  | GGAGTTCAGACGTGTGCTCTCCGATCTTCCTCGTCTGC<br>TCTCACTT         | Reverse primer EMX1_3        |
| EMX1_4_F  | CTTTCCTACACGACGCTCTCCGATCTNNNNNNAGAGGC<br>TGAAGAGGAAGACCA  | Forward primer EMX1_4        |
| EMX1_4_R  | GGAGTTCAGACGTGTGCTCTCCGATCTGGCCAGCTGTG<br>CATTCTAT         | Reverse primer EMX1_4        |
| EMX1_6_F  | CTTTCCTACACGACGCTCTCCGATCTNNNNNNCCAAGA<br>GGGCCAAGTCCTG    | Forward primer EMX1_6        |
| EMX1_6_R  | GGAGTTCAGACGTGTGCTCTCCGATCTCAGCGAGGAGTG<br>ACAGCC          | Reverse primer EMX1_6        |
| EMX1_7_F  | CTTTCCTACACGACGCTCTCCGATCTNNNNNNCACTCC<br>ACCTGATCTCGGGG   | Forward primer EMX1_7        |
| EMX1_7_R  | GGAGTTCAGACGTGTGCTCTCCGATCTCGAGGAGGGAGG<br>GAGCAG          | Reverse primer EMX1_7        |
| EMX1_8_F  | CTTTCCTACACGACGCTCTCCGATCTNNNNNNACCACA<br>AATGCCCAAGAGAC   | Forward primer EMX1_8        |
| EMX1_8_R  | GGAGTTCAGACGTGTGCTCTCCGATCTGACACAGTCAAG<br>GGCCGG          | Reverse primer EMX1_8        |
| EMX1_9_F  | CTTTCCTACACGACGCTCTCCGATCTNNNNNNCCCACC<br>TTTGAGGAGGCAAA   | Forward primer EMX1_9        |
| EMX1_9_R  | GGAGTTCAGACGTGTGCTCTCCGATCTTCCATCTGAGA<br>AGAGAGTGGT       | Reverse primer EMX1_9        |
| EMX1_10_F | CTTTCCTACACGACGCTCTCCGATCTNNNNNNGTCATA<br>CCTTGCCCTTCCT    | Forward primer<br>EMX1_10    |
| EMX1_10_R | GGAGTTCAGACGTGTGCTCTCCGATCTTCCCTAGCCCA<br>CACCAG           | Reverse primer<br>EMX1_10    |
| FANCF_1_F | CTTTCCTACACGACGCTCTCCGATCTNNNNNNCTCCGG<br>GGCCATTTCAGAAA   | Forward primer<br>FANCF_1    |
| FANCF_1_R | GGAGTTCAGACGTGTGCTCTCCGATCTCCTCGTGACCGA<br>CACACAGT        | Reverse primer<br>FANCF_1    |
| FANCF_5_F | CTTTCCTACACGACGCTCTCCGATCTNNNNNNCTCCAG<br>TACAGGGGCTTTTGC  | Forward primer<br>FANCF_5    |
| FANCF_5_R | GGAGTTCAGACGTGTGCTCTCCGATCTGAAGCAGGAATT<br>TTCCAGCACT      | Reverse primer<br>FANCF_5    |
| FANCF_6_F | CTTTCCTACACGACGCTCTCCGATCTNNNNNNCGCAGC<br>TCTCGCACACATAG   | Forward primer<br>FANCF_6    |
| FANCF_6_R | GGAGTTCAGACGTGTGCTCTCCGATCTGAGCCCAGTCTC<br>GTCCGATG        | Reverse primer<br>FANCF_6    |

|            |                                                           |                                     |
|------------|-----------------------------------------------------------|-------------------------------------|
| FANCF_7_F  | CTTTCCTACACGACGCTCTCCGATCTNNNNNNTTTCT<br>CCACGGAGGGGC     | Forward primer<br>FANCF_7           |
| FANCF_7_R  | GGAGTTCAGACGTGTGCTCTCCGATCTGGGCCGTATTG<br>GTTAGCTC        | Reverse primer<br>FANCF_7           |
| FANCF_9_F  | CTTTCCTACACGACGCTCTCCGATCTNNNNNNGAGACC<br>TAGGTGCTGCGGAA  | Forward primer<br>FANCF_9           |
| FANCF_9_R  | GGAGTTCAGACGTGTGCTCTCCGATCTTGCAACAGGGAA<br>GTCCACCG       | Reverse primer<br>FANCF_9           |
| FANCF_11_F | CTTTCCTACACGACGCTCTCCGATCTNNNNNAGCTCG<br>AGGCCGAGAATTACC  | Forward primer<br>FANCF_11          |
| FANCF_11_R | GGAGTTCAGACGTGTGCTCTCCGATCTTGTCGTCCTTCC<br>TTTCGGTCA      | Reverse primer<br>FANCF_11          |
| FANCF_15_F | CTTTCCTACACGACGCTCTCCGATCTNNNNNNGGGGGT<br>CTAGAGCATCGGG   | Forward primer<br>FANCF_15          |
| FANCF_15_R | GGAGTTCAGACGTGTGCTCTCCGATCTAGAAGTTTGGGA<br>AGGTCCCACC     | Reverse primer<br>FANCF_15          |
| GAL292_F   | CTTTCCTACACGACGCTCTCCGATCTNNNNNNGTATGG<br>GGCAGTGAGTGCTT  | Forward primer, HTS<br>PCR1, GAL292 |
| GAL292_R   | GGAGTTCAGACGTGTGCTCTCCGATCTGAGGTCTAGCCA<br>CCCTCCTC       | Reverse primer, HTS<br>PCR1, GAL292 |
| GJB2_F     | CTTTCCTACACGACGCTCTCCGATCTNNNNNCCAGCC<br>GACTTTGTCTGCAACA | Forward primer, HTS<br>PCR1, GJB2   |
| GJB2_R     | GGAGTTCAGACGTGTGCTCTCCGATCTGAAGCGGCTTC<br>GAAGATGACC      | Reverse primer, HTS<br>PCR1, GJB2   |
| ADRB2_F    | CTTTCCTACACGACGCTCTCCGATCTNNNNNCTTCTT<br>GCTGGCACCCAAT    | Forward primer, HTS<br>PCR1, ADRB2  |
| ADRB2_R    | GGAGTTCAGACGTGTGCTCTCCGATCTAACTTGCAATG<br>GCTGTGAT        | Reverse primer, HTS<br>PCR1, ADRB2  |
| MYBPC3_F   | CTTTCCTACACGACGCTCTCCGATCTNNNNNCGGCCA<br>CTCCCAGTCTCCTTTA | Forward primer, HTS<br>PCR1, MYBPC3 |
| MYBPC3_R   | GGAGTTCAGACGTGTGCTCTCCGATCTGTCCCTGGTGGA<br>CACCTCAC       | Reverse primer, HTS<br>PCR1, MYBPC3 |

## DNA sequences of CGBE constructs and BER proteins

>ACX, rXRCC1

rAPOBEC in red; nCas9 in green; rXRCC1 in blue; His-Tag in orange.

atgagctcagagactggcccagtggtgtggacccacattgagacggcggatcgagcccca  
tgagtttgaggtattcttcgatccgagagagctccgcaaggagacctgctgctttaacgaa  
ttaattggggggcgcgactccatttggcgacatacatcacagaacactaacaagcacgtc  
gaagtcaacttcacgagaagttcacgacagaaagatatttctgtccgaacacaaggtgcag  
cattacctgggttctcagctggagcccatgcggcgaatgtagtagggccatcactgaattcc  
tgtcaaggtatccccacgtcactctgtttatttacatcgcaaggctgtaccaccacgtgac  
ccccgcaatcgacaaggcctgcgggatttgatctcttcaggtgtgactatccaaattatgac  
tgagcaggagtcaggatactgctggagaaactttgtgaattatagcccagtaataagccc  
actggcctaggtatccccatctgtgggtacgactgtacgttcttgaactgtactgcatcata  
ctgggcctgcctccttgtctcaacattctgagaaggaagcagccacagctgacattctttac  
catcgctcttcagctctgtcattaccagcgcactgccccacacattctctggggccaccgggt  
tgaaaagcgggcagcgagactcccgggacctcagagtcgccacacccgaaagtgataaaaag  
tattctattgggttagccatcggcactaattccggttgatgggctgtcataaccgatgaata  
caaagtaccttcaaagaaatthaaggtgttggggaacacagaccgtcattcgattaaaaaga  
atcttatcggtgccctcctattcgatagtgggcgaacggcagaggcactcgctgaaacga  
accgctcgggagaaggtatacacgtcgcaagaaccgaatatgttacttacaagaaatthttag  
caatgagatggccaaagttgacgattctttctttcaccggttgggaagagtccttccttgctc  
aagaggacaagaaacatgaacggcaccatcttggaaacatagtagatgaggtggcatat  
catgaaaagtacccaacgatttatcacctcagaaaaaagctagttgactcaactgataaagc  
ggacctgaggttaatctacttggctcttgcccatatgataaagttccgtgggcactttctca  
ttgagggatgatctaaatccggacaactcggatgtcgacaaactgttcatccagttagtaca  
acctataatcagttgtttgaagagaacctataaatgcaagtggcgtggatgcgaaggctat  
tcttagcgcgccctctctaaatcccgcagcgtagaaaacctgatcgacacattaccgggag  
agaagaaaaatgggttgttcggtaaccttatagcgtctcactaggcctgacaccaaatttt  
aagtcgaacttcgacttagctgaagatgccaaattgcagcttagtaaggacacgtacgatga  
cgatctcgacaatctactggcacaattggagatcagtatgcggacttatttttggtgcc  
aaaaccttagcgatgcaatcctcctatctgacatactgagagttaatactgagattaccaag  
gcgccgttatccgcttcaatgatcaaaaggtacgatgaacatcaccaagacttgacacttct  
caaggccctagtcgctcagcaactgcctgagaataataaggaaatattctttgatcagtcga  
aaaacgggtacgcaggttatattgacggcggagcgcagtcgaaggaattctacaagttht  
aaacctatattagagaagatggatgggacggaagagttgcttgtaaaactcaatcgcaaga  
tctactgcgaaagcagcggactttcgacaacggtagcattccacatcaaatccacttaggcg  
aattgcatgctatacttagaaggcaggaggtttttatccgcttctcaaagacaatcgtgaa  
aagattgagaaaatcctaacctttcgcataccttactatgtgggaccctggcccaggaa  
ctctcggttcgcgatggatgacaagaaagtcggaagaaacgattactccatggaatthtgagg  
aagttgtcgataaaggtgcgtcagctcaatcgttcatcgagaggatgaccaactthgacaag  
aatttacggaacgaaaaagattgcctaagcacagtttactttacgagatthtcacagtgt  
caatgaactcacgaaagttaagtatgtcactgagggcatgcgtaaacccgcctthtcaagcg  
gagaacagaagaaagcaatagtagatctgttattcaagaccaaccgcaagtgacagtttaag  
caattgaaagaggactactthtaagaaaattgaatgcttcgattctgtcgagatctccggggt  
agaagatcgatttaatgcgtcacttggtagctatcatgacctcctaaagataatthaaagata  
aggacttcttgataacgaagagaatgaagatatcttagaagatatagtggtgactcttacc

ctctttgaagatcgggaaatgattgaggaaagactaaaaacatacgctcacctgttcgacga  
taaggttatgaaacagttaaagaggcgctcgctatacgggctggggacgattgtcgcggaac  
ttatcaacgggataagagacaagcaagtggtaaaactattctcgatcttctaaagagcgac  
ggcttcgccaataggaactttatgcagctgatccatgatgactctttaaccttcaaagagga  
tatacaaaaggcacaggtttccggacaaggggactcattgcacgaacataattgccaatcttg  
ctggttcgcccagccatcaaaaagggcatactccagacagtcaaagtagtgatgagctagtt  
aaggatcagggacgtcaciaaacgggaaaacattgtaatcgagatggcacgcaaaatcaaac  
gactcagaaggggcaaaaaacagtcgagagcggatgaagagaatagaagagggtattaaag  
aactgggcagccagatcttaaggagcatcctgtggaaaatacccaattgcagaacgagaaa  
ctttacctctattacctacaaaatggaaggacatgtatggtgatcaggaactggacataaa  
ccgtttatctgattacgacgctcgatcacattgtaccccaatcctttttgaaggacgattcaa  
tcgacaataaagtgttacacgctcggataagaaccgagggaaaagtgacaatggtccaagc  
gaggaagtcgtaaagaaaatgaagaactattggcggcagctcctaaatgcgaaaactgataac  
gcaaagaaagttcgataacttaactaaagctgagaggggtggcttgtctgaacttgacaagg  
ccgatttattaaacgtcagctcgtgaaaccgccaatcaciaagcatggtgcacagata  
ctagattcccgaatgaatacgaatacgcagagaacgataagctgattcgggaagtc aaagt  
aatcactttaagtc aaaattggtgtcggacttcagaaaaggatcttcaattctataaagtt  
gggagataaataactaccaccatgcgacgacgcttatcttaatgccgtcgtagggaccgca  
ctcattaagaaatacccgaagctagaaagtgagtttgtgtatggtgattacaaagtttatga  
cgtccgtaagatgatcgcgaaaagcgaacaggagataggcaaggctacagccaaatacttct  
tttattctaacattatgaatttctttaagacggaaatcactctggcaaacggagagatacgc  
aaacgacctttaattgaaaccaatggggagacaggtgaaatcgtatgggataaggccggga  
cttcgacgaggtgagaaaagtttgtccatgcccccaagtcacatagtaaagaaaactgagg  
tgcagaccggagggttttcaaaggaatcgattcttccaaaaggaatagtgataagctcatc  
gctcgtaaaaaggactgggacccgaaaaagtacgggtggcttcgatagccctacagttgccta  
ttctgtcctagtagtggaagttgagaagggaaaatccaagaaactgaagtcagtc aaag  
aattattggggataacgattatggagcgcctcgtcttttgaaaagaaccccatcgacttcctt  
gaggcgaaaggttacaaggaagtaaaaaaggatctcataattaactaccaaagtatagttc  
gtttgagttagaaaatggccgaaaacggatggtggctagcgcggagagcttcaaaggggga  
acgaactcgcactaccgtctaaatacgtgaatttctctgatttagcgtccattacgagaag  
ttgaaaggttcacctgaagataacgaacagaagcaactttttggtgagcagcaciaacatta  
tctcgacgaaatcatagagcaaatttcggaattcagtaagagagtcacctagctgatgcc  
atctggacaaagtattaagcgcatacaacaagcacagggataaacccatacgtgagcagggc  
gaaaatattatccatttgtttactcttaccaacctcggcgcctccagccgattcaagtat  
tgacacaacgatagatcgaaacgatacacttctaccaaggaggtgctagacgcgacactga  
ttaccaatccatcacgggattatatgaaactcggatagatttgtcacagcttggggggtgac  
tctggtggttctcctgagataagcctccgccacgtcgtaaagttgctccagtc aagactccac  
tcatcgagctgagaacttggtgaaagccgacacgtacagaaagtggaggagcgccaaagcag  
gggaaaaaacgatatccgtcgttttgcagctggagaaagaggaacagatacacagcgttgac  
atcggaaacgatggcagtgcatcttgtagaagttttggttggttagtagcgcaggagggcgtac  
ggccggtgagcaagactatgaagtgctcttgggtgaccagctctttcatgtcccgtctgaaa  
gccgaagcgggtctaacc caaatagggtccgaatattcgggcccggataaattgggttagagcc  
gctgctgagaagaggtgggaccgcgttaagattgtatggtcacagccgtattccaaggacag  
cccgtatgggctctcatttgttaaatctcatagccccccagataaggacgaggccgaagctc  
cgtcacagaaggtgactgtaactaaacttgga caattccgagtc aaagaggaggtgattca  
gcgaatagttccggcccgggtgcgttgttttcaatcgc atcaaciaagctgccagcgaag  
tgctcagaccctgcccggcctagttatgccgcagcaactctgcaagccagttcagctgcgt



caagtgctctccccgtcccaaagggttgggcggttcttctcaaaaactgcaagagcctccaaag  
ggcaagcgggaagcttgatctgggattggaggattcaaaacctccctctaaaccttcagcggg  
acctgcagctctgaagagacctaaactcccgggtcccgtctcggacgcgggccacaccag  
caagtactcctgcgacagaaggcagttcccgggaaaccaagaggtgagggcaccgaaccgcgc  
ggggctcgggctgggtccccaagagttggggaagattctccaaggagtggtggctcgtacttag  
tggcttcagaatcctttccgctctgaacttcgacgacaaagcgttgagagcttggtgccaat  
acagaccagactggaccctgactctaccatttgatctgtgcatttgccaatactccgaaa  
tatagtcaagttcttgggcttggtggtagaattggttagaaaagagtggttattggactgcta  
ccgaatgcaagaaggctgccttcacgaaggtacctcatggctggccttgggtcctcatctg  
aggacgagggagatagccactctgagtcggcgaggatgaagcgcctaaattgccacggaag  
aggccccaaccgaaggctaagacgcaagccgctgggccaagtctccaccaagacctccaac  
gccagaagagaccaaaagccccatcacccggcccacaggataactccgacactgatggggagc  
aaagcgaggggtcgagataatggagcggaggactccggtgatactgaagatgaactcaggcgc  
gtggcgaagcaacgggaacaaaggcagccgctgcaccagaggaaaatggagaggatccata  
cgcgggtagtacagacgagaatactgattcagaagctccttccgaggccgacctccccatac  
ccgagctccccgacttcttccagggcaagcatttcttctctacggcgagttccccggagac  
gaacgaaggaaactcatccgatacgttacagcatttaatggcgagttggaagattacatgct  
tgatagggtagacagtttgtgatcacccgcgaagagtggtatcctaattttgaggaggccttga  
tggaaaatccctctcttggcttttggctcggcccagatggatataattcttgcaatgaaaagcaa  
aagttgctccctcatcagttgtatggggctgtaaccacaggcatctgggtggttctccaagaa  
gaagaggaaggtctaaccggtcatcatcaccatcaccatga

>ACX, rPB(8kD)

rAPOBEC in red; nCas9 in green; rPB(8kD) in blue; His-Tag in orange.

atgagctcagagactggcccagtggtgtggacccccacattgagacggcggatcgagcccca  
tgagtttgaggtattcttcgatccgagagagctccgcaaggagacctgctgctttacgaaa  
ttaattgggggggcccggcactccatttggcgacatacatcacagaacactaacaagcacgctc  
gaagtcaacttcatcgagaagttcacgacagaaaagatatttctgtccgaacacaaggtgcag  
cattacctggtttctcagctggagcccatgcccgaatgtagtagggccatcactgaattcc  
tgtcaaggtatccccacgtcactctgtttatttacatcgcaaggctgtaccaccacgctgac  
ccccgcaatcgacaaggcctgcccggatttgatctcttcaggtgtgactatccaaattatgac  
tgagcaggagtcaggatactgctggagaaactttgtgaattatagcccagtaataagccc  
actggcctaggtatccccatctgtgggtacgactgtacgttcttgaactgtactgcatcata  
ctgggctgcctccttgtctcaacattctgagaaggaagcagccacagctgacattctttac  
categctcttcagttgtcattaccagcagctgccccacacattctctggggccaccgggt  
tgaaaagcggcgagcagactcccgggacctcagagtcggccacaccgaaagtgataaaaag  
tattctattggttttagccatcggcactaattccgttggtggtggtggtggtggtggtggtggt  
caaagtaccttcaaagaaatthaagggtgttggggaacacagaccgtcattcgattaaaaga  
atcttatcgggtgccctcctattcgatagtgccgaaacggcagaggcgactcgccctgaaacga  
accgctcggagaaggtatacacgtcgcaagaaccgaatatgttacttacaagaaattttttag  
caatgagatggccaaagttgacgattctttctttcaccggttgggaagagtccttcttctgctg  
aagaggacaagaacatgaacggcaccatcttggaaacatagtagatgaggtggcatat  
catgaaaagtaccaacgatttatcacctcagaaaaaagctagttgactcaactgataaagc  
ggacctgaggttaactacttggctcttgccatatagataaagttccgtgggcactttctca  
ttgaggtgatctaaatccggacaactcggatgtcgacaaactggttcatccagttagtacaa  
acctataatcagttgtttgaagagaaccctataaatgcaagtgggcgtggatgcaaggtat

tcttagcgcccgctctctaaatcccgaocggctagaaaacctgatcgacacaattaccogag  
agaagaaaaatgggttggcgttaaccttatagcgctctcactaggcctgacaccaaat  
aagtogaacttcgacttagctgaagatgcaaattgcagcttagtaaggacagctacgatga  
cgatctcgacaatctactggcacaattggagatcagtatgcggacttatttttggtgcca  
aaaaccttagcgatgcaatcctcctatctgacatactgagagttaatactgagattaccaag  
goccggttatccgcttcaatgatcaaaaggtagatgaacatcaccaagacttgacacttct  
caaggccctagtcgctcagcaactgcctgagaaatataaggaaatattctttgatcagtcga  
aaaacgggtacgcaggttatattgacggcggagcgagtcaagaggaattctacaagtttatc  
aaacccatattagagaagatggatgggacggaagagttgcttgtaaaactcaatcgcaaga  
tctactgcaaaagcagcggactttcgacaacggtagcattccacatcaaatccacttaggcg  
aattgcatgctatacttagaaggcaggaggatttttatccgctcctcaaagacaatcgtgaa  
aagattgagaaaatcctaacctttcgcataccttactatgtgggaccctggcccagggaa  
ctctcggttcgcagtgatgacaagaaagtccgaagaaacgattactccatggaattttgagg  
aagttgtcgataaagggtgcgtcagctcaatcgttcatcgagaggatgaccaactttgacaag  
aatttaccgaacgaaaaagtattgcctaagcacagtttactttacgagtatttcacagtgt  
caatgaactcacgaaagttaagtatgtcactgagggcatgcgtaaacccgcctttctaagcg  
gagaacagaagaaagcaatagtagatctgttattcaagaccaaccgcaaagtgcagtttaag  
caattgaaagaggactactttaagaaaattgaatgcttcgattctgtcgagatctccggggt  
agaagatcgatttaatgcgtcacttggtacgtatcatgacctcctaaagataattaagata  
aggacttccctggataacgaagagaatgaagatatcttagaagatatagtggtgactcttacc  
ctctttgaagatcgggaaatgattgaggaaagactaaaaacatacgtccactgttcgacga  
taaggttatgaaacagttaaagaggcgtcgcctatacgggctggggacgattgtcgcggaaac  
ttatcaacgggataagagacaagcaaaagtggtaaaactattctcgattttctaagagcgcac  
ggcttcgccaataggaactttatgcagctgatccatgatgactctttaaccttcaaagagga  
tatacaaaaggcacaggtttccggacaaggggactcattgcacgaacatattgcgaatcttg  
ctggttcgcagccatcaaaaagggcatactccagacagtcaaagtagtgatgagctagtt  
aaggatcagggagctcacaacccgaaaacattgtaatcgagatggcacgcgaaaatcaaac  
gactcagaaggggcaaaaaaacagtcgagagcggatgaagagaatagaagagggtattaaag  
aactgggcagccagatcttaaggagcatcctgtggaaaatacccaattgcagaacgagaaa  
ctttacctctattacctacaaaatggaaggacatgtatggtgatcaggaactggacataaa  
ccgtttatctgattacgacgctcgatcacattgtaccccaatcctttttgaaggacgattcaa  
tcgacaataaagtgttacacgctcggataagaaccgagggaaaagtgacaatgttccaagc  
gaggaagtcgtaaaagaaaatgaagaactattggcggcagctcctaaatgcgaaactgataac  
gcaaagaaagttcgataacttaactaaagctgagaggggtggcttgctgaacttgacaagg  
ccgatttattaaacgtcagctcgtggaaaccgccaatcacaagcatgttgcacagata  
ctagattcccgaatgaatacgaatacgcagagaaacgataagctgattcgggaagtcaaagt  
aatcactttaaagtcaaaattgggtgtcggacttcagaaaggattttcaattctataaagtta  
gggagataaataactaccacatgcgcacgacgcttatcttaatgccgtcgtagggaccgca  
ctcattaagaaatacccgaagctagaaagtgagtttgtgtatggtgattacaaagtttatga  
cgtccgtaagatgatcgcaaaaagcgaacaggagataggcaaggctacagccaaatacttct  
ttatttctaacattatgaattttctttaagacggaaatcactctggcaaaccggagagatacgc  
aaacgacctttaattgaaaccaatggggagacaggtgaaatcgatgggataaggccggga  
cttcgcgacgggtgagaaaagttttgcctatgcccccaagtcaacatagtaaagaaaactgagg  
tgcaagaccggagggttttcaaaggaatcgattcttccaaaaaggaatagtgataagctcatc  
gctcgtaaaaaggactgggaccgaaaaagtacggtggcttcgatagccctacagttgccta  
ttctgtcctagtagtggaagaaagttgagaagggaaaatccaagaaactgaagtcagtcaaag  
aattattggggataacgattatggagcgcctcgtcttttgaagaaccccatcgacttctt

gaggcgaaaggttacaaggaagtaaaaaaggatctcataattaactaccaaagtatagtct  
gtttgagttagaaaatggccgaaaacggatgttggctagcgccggagagcttcaaaagggga  
acgaactcgcaactaccgtctaaatacgtgaatttcctgtatttagcgtcccattacgagaag  
ttgaaaggttcacctgaagataacgaacagaagcaactttttggtgagcagcacaacatta  
tctcgacgaaatcatagagcaaatttcggaattcagtaagagagtcctctagctgatgcca  
atctggacaaagtattaagcgcatacaacaagcacagggataaaccatacgtgagcaggcg  
gaaaatattatccatttgtttactcttaccacacctcggcgctccagccgcattcaagtattt  
tgacacaacgatagatcgcaaacgatacacttctaccaaggagggtgctagacgcgacactga  
ttaccaatccatcacgggattatatgaaactcggatagatttgtcacagcttgggggtgac  
tctggtggttctagcaaacgcaaggccccgcaggagaccctcaacggcggcatcacggacat  
gctcgtggaactcgcaaactttgagaagaacgtgagccaggcgatccacaagtacaatgcat  
acagaaaagcagcatctgtgatagcaaagtacccacacaaaatcaagagtggagcagaagct  
aagaaattgccaggagtaggaacaaaaattgctgaaaagattgatgaatttttagcaactgg  
aaaattgcgtaaactggaaaagtctggtggttctcccaagaagaagaggaaaagtctaaccgg  
tcatcatcaccatcaccattga

>hPB(8kD)

agcaaacggaaggcgccgcaggagactctcaacgggggaatcaccgacatgctcacagaact  
cgcaaactttgagaagaacgtgagccaagctatccacaagtacaatgcttacagaaaagcag  
catctgttatagcaaaaataccacacaaaaataaagagtggagctgaagctaagaaattgcct  
ggagttaggaacaaaaattgctgaaaagattgatgagtttttagcaactggaaaattacgtaa  
actggaaaag

>hPB(14kD)

agcaaacggaaggcgccgcaggagactctcaacgggggaatcaccgacatgctcacagaact  
cgcaaactttgagaagaacgtgagccaagctatccacaagtacaatgcttacagaaaagcag  
catctgttatagcaaaaataccacacaaaaataaagagtggagctgaagctaagaaattgcct  
ggagttaggaacaaaaattgctgaaaagattgatgagtttttagcaactggaaaattacgtaa  
actggaaaagattcggcaggatgatacagagttcatccatcaatttcctgactcgagttagt  
gcattggtccatctgctgcaaggaagtttgtagatgaaggaattaaaacactagaagatctc  
agaaaaaatgaagataaattgaaccatcatcagcgaattgggctgaaa

>rPB(14kD)

agcaaacgcaaggccccgcaggagaccctcaacggcggcatcacggacatgctcgtggaact  
cgcaaactttgagaagaacgtgagccaggcgatccacaagtacaatgcatacagaaaagcag  
catctgtgatagcaaagtacccacacaaaatcaagagtggagcagaagctaagaaattgcc  
ggagttaggaacaaaaattgctgaaaagattgatgaatttttagcaactggaaaattgcgtaa  
actggaaaagattcgtcaggatgatacaagttcatccatcaacttcctgactcgagttactg  
gcatcgggccatctgctgcaaggaagcttgtagatgaaggaattaaaacattagaagatctc  
agaaaaaatgaagataaattgaaccatcatcagcgaattgggctgaaa

### >hLIG3

tctaaggcagcaggtacaccaagaagaagctggtgtccaggctaagttgacaaccactgg  
ccaggtgacttctccagtgaaggcgcctcatttgtcaccagtaccaatccccgaaat  
ctggcttttcagccaagcccaacaactctggggaagccccctcgagccccaccctaa  
gagaagtctgtcttcaagcaaagtgtgaccccaggcataaggactgtctgctacggg  
gagtttcgaaa  
gttatgcgccatggtggccgataatcctagctacaacacgaagaccagatcatcc  
aggacttccttcggaaggctcagcaggagatgggtttccacgggtgatgtgtaccta  
acagtgaaagctgctgctgccaggagtcattaagactgtttacaacttgaacgata  
agcagattgtgaagcttttcagtcgcatttttaactgcaaccagatgatatggcac  
gggacctagagcaggggtgacgtgacagagacaatcagagtcttctttgagcaga  
gcaagtcttccccccagctgccaaagagcctccttaccatccaggaagtggatg  
agtcttctgctggctgtccaagctcaccaaggaggatgagcagcaacaggccct  
acaggacattgcctccagggtgtacagccaatgaccttaaatgcatctcagggt  
gatcaaacatgatctgaagatgaactcaggtgcaaaacatgtgtagacgcctt  
gacccaatgcctatgaagccttcaaagcctcgcgcaacctgcaggatgtggtg  
gagcgggtccttcacaacgcgcagggaggtggagaaAgagccgggccagagacg  
agctctgagcgtccaggcctcgctgatgacacctgtgcagccatggtggcggagg  
cctgcaagtccgttgagtatgcaatgaagaaatgtcccaatggcatggtctctg  
agatcaagtagatggagagcaggtgcataagaatggagaccacttcagctactt  
cagccgcagtctcaagccccgtccttcctcacaaggtggcccaactttaaggact  
acattccccaggttttctctgggggcccacagcatgatcttgattctgaagtg  
cttctgattgacaacaagacaggcaaaccactgcccttgggactctgggagtaca  
caagaaagcagccttccaggatgctaattgtctgcctgttgtttttgattgtat  
ctactttaatgatgtcagcttgatggacagacctctgtgtgagcggcggaaagt  
ttcttcatgacaacatgggtgaaattccaaaccggatcatgttctcagaaatgaa  
gagctcacaagctttggacttggtgacatgataaccgggtgatccaggagggatt  
ggaggggctggtgctgaaggatgtgaaggggtacatatgagcctgggaagcgg  
cactggctgaaagtgaagaaagactatttgaaacgagggggccatggccgacac  
agctgacctgggtggtccttggagccttctatgggcaaggagcaaaggcggcat  
gatgtcaatcttctcatgggctgctacgacctggcagccagaagtggtgcacag  
tcaccaagtgtgcaggaggccatgatgatgccacgcttgcccgcctgcagaat  
gaactagacatggtgaagatcagcaaggaccccagcaaaataaccagctgggt  
tgaaggtcaacaagatctactatcctgacttcatcgtcccagacccaagaagct  
gcccgtgtgggagatcacaggggctgaattctccaaatcggaggctcatacagct  
gacgggatctccatccgattccctcgctgcaccogaatccgagatgataaggact  
ggaaatctgccactaaccttccccaaactcaaggactgtaccagttgtccaagg  
agaaggcagacttcaactgtagtggctggagatgaggggagctccactacaggg  
gtagcagtgaagagaataagggctcctcagggctctgctgtgtcccgaagg  
ccccccagcaagcctcagccagtagccaagaaagcagaaggggaagctgagta  
actccaaacagcaaagatggcaacatgcagactgcaaagccttccgctatgaa  
ggtgggggagaagctggccacaaagtcttctccagtgaaagtaggggagaagc  
ggaaagctgctgatgagacgctgtgcaaacaaaggtattgctggacatcttca  
ctgggggtgcggctttacttgccaccctccacaccagacttcagccgtctcaga  
cgtactttgtggcattcgacggggacctggtacaggaatttgatatgacttcag  
ccacgcacgtgctgggtagcagggacaagaaccctgcggcccagcaggtctccc  
cagagtggtttgggcatgtatccggaaacggagactggttagctccctgc

### >rLIG3

actttggcattcaaaaactggtcccgcggaacctttgtgcattgggtcgaaaaga  
attgtgtctgttttagcgaacaacaccactggcctgcgatcagacaattttccag  
tgaggatgagacta

atcttctttgtggctgctgtttgttgcagcgacgaaaaccggtcctgtcttttcagcgaggt  
catttgcggcctcgcgctacgcacctcatatcatggagtggttcccatgtgggactgtgcac  
gggcccttgcgagatggcagagcagcgattttgtgtggattacgctaagcgcgggaccgccc  
gctgcaagaagtgcaaagaaaagattgtcaaggggtgtttgtcggatcgggaaggtcgtaccg  
aacctttttcagaaagcggggcgacatgaaagaatgggatcatataaaaatgtatgtttga  
gaaactcgaaagagctcgagcgaccacgaaaaagatcgaggatttgacagagctcgaaggct  
gggaggagctggaagacaacgaaaaggaacagattagccaacacatagctgatctcagcagt  
aagacagcggcaactcccaaaaagaaagctactgtgcaggccaagctcacaaccacggggca  
ggtaacctctccagtgaaggagcaggttttataacatccacgaacctcggaagttctcag  
gattttccgcagcaaaaccaacaatagtgaacaggatccatccagccctgccctaaaacc  
tctttgtcagcatctaagtgcgacccccaaacataaagattgtctgcttcgagaatttcgaaa  
gctgtgcgcgatggtagcagaaaatccgtcttataatacaaaaacgaaaataatccacgatt  
ttctccagaagggttctacgggcgacggattccgcggggatgtgtatcttaccgttaaactc  
ttgctgccaggggtaattaaatccgtgtacaatctgaacgataaacaataatagtttaagttgt  
ttcacggatcttcaactgtaatcccgatgatatggcgagagacctggaacaggggtgacgtga  
gtgagacaatccgggtgtttttcgaacaatctaagagttttccgccggccgcaaaaagtctg  
ctgacaattcaggaggtcgatgcattcctccttcaacttgagtaaactgaccaaaagaggatga  
gcaacaacaggcccttcaggacattgctagtcgggtgcacggcgaatgatcttaagtgtatca  
taaggctcataaaacacgatctgaaaatgaattctggcggaagcacgttctggacgcgttg  
gacccaatgcttacgaagccttcaaggcctccagaaatgtgcaggacgtcgtcgaacgggt  
gttgcacaatgaacaagaggtcgagaaggatccgggcccggcgagagcgcctctcagttcaag  
cgtctctgatgacacctgtgcagccgatgcttgccggaggcttgtaagtcaattgagtatgca  
atgaaaaagtgcccaacggcatgttttagtgaaatcaatacgcgggtgagcgcgttcaggt  
gcacaagaaaggcgatcacttcagctacttttcccgaagcctgaaaccggtgctgccccaca  
aggctgcccactttaagactacatcccaaaagcatttccaggggggtcagtcctatgatcctg  
gactctgaggtcctgctcatcgataacaatactgggaaacccttccgtttggaacgctggg  
gggtgcacaagaaagctgcatttcaagacgcgaatgtatgtctgtttgtgtttgattgcatct  
atthtaatgacgtgtcattgatggacaggccgtttgtgagagagaagaaaatttcttcatgac  
aatatggtagaaattcgaaacaggattatgttttcagagatgaagcaagtaactaaagccag  
cgatctggccgatatgattaatcgcgtcatacgcgaggggcttgaggggctcgtcttgaagg  
acgtcaagggcagctatgaaccgggaaaaagacactggctcaaggtaaaaaaagattacctg  
aatgagggagccatggctgataccgccgatctggtagttcttgagcgttctacgggtcaagg  
ctccaaggggtgggatgatgtcaatctttctcatgggatgctatgaccggattcccaaaaat  
gggtcacagtgacaaagtgcgcggggtggatcatgatgatgcgacccttgctcggcttcaaaag  
gaactcgacatggttaagatcagcaaggaccctccaaaattcctagttggctcaagataaa  
taagataatattaccagacttcatcgtcccagaccccaaaaaagcagctgtttgggaaatta  
cgggtgcagagttcagtaggagtgaggcacacactgccgacgggatttcaatccgatttcca  
cgatgtactaggatacagagatgataaagactggaagtctgccactaacttgccacaactgaa  
agagctttaccaattgtcaaaggataaagctgatttcgcggtagtcgccggggatgagggga  
gctccacaactggaggatccaatggagagaaatgaggggaccgcccgggtccacagtgccccgg  
aaaggtccgaaaggcccaccctccaagagtagtgcatctgctaaaaagactgaacagaagct  
gaatgatccatcatcacgcgggtggggaaaagtggcggttaaagtcctctccggtgaaagtgg  
gtatgaagcgcgaaggccgcagatgagactccgggtcttacaagaggagaagagcaagtagg  
caaagaggggagggcgagcaatgcggacggggcggcgg

>hXRCC1

ggaccggagatccgcctccgcatgtcgtgtcctgcagcagccaggactcgactcactgtgc  
agaaaatcttctcaaggcagacacttaccgaaaatggcgggcagccaaggcagggcagagaaga  
ccatctctgtggtcctacagttggagaaggaggagcagatacacagtgtggacattgggaat  
gatggctcagcttctcgtggaggtgctggtgggcagttcagctggaggcgctggggagcaaga  
ctatgaggtccttctggtcacctcatcttctcatgtccccttccgagagccgcagtggtcaa  
accccaaccgcgttcgcatgtttgggcctgacaagctgggtccgggcagccgcagagaagcgc  
tgggaccgggtcaaaattgtttgcagccagccctacagcaaggactcccccttggcttgag  
ttttgtacggtttcatagccccccagacaaagatgagggcagaggccccgtcccagaaggtga  
cagtgaccaagcttggccagttccgtgtgaaggaggaggatgagagcgcacaactctctgagg  
ccgggggctctcttctcagccggatcaacaagacatccccagtcacagccagcgacccggc  
aggacctagctatgcagctgctaccctccaggcttctagtgtgctcctcagcctctccag  
tctccaggggccataggcagcacctccaagccccaggagtctcccaaaggaagaggaagttg  
gatttgaaccaagaagaaaagaagacccccagcaaaccaccagcccagctgtcgccatctgt  
tccaagagacctaattgccagctccaactcgtaccccagccacagccccagtcctgccc  
gagcacagggggcagtgacaggcaaaccgaggagaaggcaccgagcccagacgacccccga  
gctggcccagaggagctggggaagatccttcagggtgtggtagtgggtgctgagtggctcca  
gaacccttccgctccgagctgagagataaggccctagagcttggggccaagtatcggccag  
actggacccgggacagcacgcacctcatctgtgccttggccaacaccccccaagtacagccag  
gtcctaggcctgggaggccgcacgtcgtgctgtaaggagtgggtgctggactgtcaccgcatgctg  
tcggcggctgccctcccAgaggtacctcatggcagggccagggtccagcagtgaggaggatg  
aggcctctcacagcgggtggcagcggagatgaagcccccaagcttccctcagaagcaaccag  
acaaaaccaagcccactcaggcagctggaccagctcaccaccagaagcccccaaccctga  
agagaccaaagcagcctcaccagtgctccaggaagatatagacattgaggggggtacagtcag  
aaggacaggacaatggggcggaagattctggggacacagaggatgagctgaggaggggtggca  
gagcagaaggaacacagactgccccctggccaggaggagaatggggaagaccggtatgcagg  
ctccacggatgagaacacggacagtgaggaacaccaggagcctcctgatctgccagtcctg  
agctcccagatttcttccagggaagcacttcttctttacggggagttccctggggacgag  
cggcggaactcatccgatacgtcacagccttcaatggggagctcgaggactatagagtga  
ccgggttcagtttgtgatcacagcacaggaatgggatcccagcttggaggaggccctgatgg  
acaaccctccctggcattcgttcgtccccgatggatctacagttgcaatgagaagcagaag  
ttacttccctcaccagctctatgggggtggtgccgcaagcc

## DNA sequences of pegRNA and sgRNA used for prime editing

pegRNA (HEK2) – spacer is in blue

ccagcccgctggccctgtaa gttttagagctagaaatagcaagttaaaataaggctagtccg  
ttatcaacttgaaaaagtggcaccgagtcggtgctctatgctttctgttccagtttcctta  
cagggccagcggg

sgRNA (HEK2) – spacer is in blue

gcacttgtttgcagctattc gttttagagctagaaatagcaagttaaaataaggctagtccg  
ttatcaacttgaaaaagtggcaccgagtcggtgc

pegRNA (HEK4) – spacer is in blue

gcggcgccccggtggcactg Gttttagagctagaaatagcaagttaaaataaggctagtccg  
ttatcaacttgaaaaagtggcaccgagtcggtgctccagccgcactgccaccggggcg

sgRNA (HEK4) – spacer is in blue

ccctgcctgtcatcctgctt gttttagagctagaaatagcaagttaaaataaggctagtccg  
ttatcaacttgaaaaagtggcaccgagtcggtgc

pegRNA (RNF2) – spacer is in blue

tgagttacaacgaacacctc gttttagagctagaaatagcaagttaaaataaggctagtccg  
ttatcaacttgaaaaagtggcaccgagtcggtgctggcagtcattcttagtcattacctgagg  
tgttcgttgtaa

pegRNA (RNF2) – spacer is in blue

agttcccatgttttgcttaa gttttagagctagaaatagcaagttaaaataaggctagtccg  
ttatcaacttgaaaaagtggcaccgagtcggtgc

## Supplementary References:

1. Doman, J. L., Raguram, A., Newby, G. A., Liu, D. R. Evaluation and minimization of Cas9-independent off-target DNA editing by cytosine base editors. *Nat. Biotechnol.* 38, 620-628 (2020).
2. Kim, D. et al. Genome-wide target specificities of CRISPR RNA-guided programmable deaminases. *Nat. Biotechnol.* 35, 475-480 (2017).
3. Zeng, J. et al. Therapeutic base editing of human hematopoietic stem cells. *Nat. Med.* 26, 535-541 (2020).
4. Liu, D. R., Koblan, L. W. Cytosine to Guanine Base Editor. World Intellectual Property Organization (2018).
5. Kurt, I. C. et al. CRISPR C-to-G base editors for inducing targeted DNA transversions in human cells. *Nat. Biotechnol.* (2020). <https://doi.org/10.1038/s41587-020-0609-x>

6. Zhao, D. et al. New base editors change C to A in bacteria and C to G in mammalian cells. *Nat. Biotechnol.* (2020). <https://doi.org/10.1038/s41587-020-0592-2>
